# Supplementary material
Source: HighWire-hosted journal article supplement (https://bmjopen.bmj.com/content/8/3/e020439)
Supplement: inline-supplementary-material-1 [file inline-supplementary-material-1.pdf]

# Opportunities and challenges to improving antibiotic prescribing practices through a One Health approach: results of a comparative survey of doctors, dentists, and veterinarians

## Supplementary Material

This document provides additional details on participant recruitment and complete data tables corresponding with data in Figures 1, 2, and 3.

### Table of contents

|                                                                                                                                                                                                                                                                                     |    |
|-------------------------------------------------------------------------------------------------------------------------------------------------------------------------------------------------------------------------------------------------------------------------------------|----|
| <b>Additional details on recruitment and data collection</b> .....                                                                                                                                                                                                                  | 2  |
| <b>Supplementary Table 1.</b> Channels and modes through which potential participants were notified of the online survey. ....                                                                                                                                                      | 2  |
| <b>Data figures and tables related to Figure 1:</b>                                                                                                                                                                                                                                 |    |
| <b>Supplementary Figure 1.</b> Stacked bar charts of responses regarding knowledge and beliefs about antibiotic resistance (corresponds with Figure 1a), and perceptions of drivers contributing to the issue of antibiotic resistance (corresponds with Figure 1b). ....           | 3  |
| <b>Supplementary Table 2.</b> Relative extent to which respondents agreed/disagreed with statements about antibiotic resistance and Kruskal-Wallis test results (Figure 1a data). ....                                                                                              | 4  |
| <b>Supplementary Table 3.</b> Relative extent to which respondents believed the listed factors as contributing to the issue of antibiotic resistance and Kruskal-Wallis test results (Figure 1b data). ....                                                                         | 6  |
| <b>Data figures and tables related to Figure 2:</b>                                                                                                                                                                                                                                 |    |
| <b>Supplementary Figure 2.</b> Stacked bar charts of responses regarding beliefs about current levels of antibiotic use as drivers of antibiotic resistance (corresponds with Figure 2a), and the extent of the problem of antibiotic resistance (corresponds with Figure 2b). .... | 9  |
| <b>Supplementary Figure 3.</b> Stacked bar charts of responses regarding perceived importance of stakeholders in managing/preventing the issue of antibiotic resistance (corresponds with Figure 2c). ....                                                                          | 10 |
| <b>Supplementary Table 4.</b> Relative extent to which respondents believed that current levels of antibiotic use as contributing to antibiotic resistance and Kruskal-Wallis test results (Figure 2a data). ....                                                                   | 11 |
| <b>Supplementary Table 5.</b> Relative extent to which respondents believed that antibiotic resistance is a problem to the health of the listed groups and individuals and Kruskal-Wallis test results (Figure 2b data). ....                                                       | 13 |
| <b>Supplementary Table 6.</b> Perceived relative importance of the roles of stakeholders in managing/preventing the issue of antibiotic resistance and Kruskal-Wallis test results (Figure 2c data). ....                                                                           | 15 |
| <b>Data figures and tables related to Figure 3:</b>                                                                                                                                                                                                                                 |    |
| <b>Supplementary Figure 4.</b> Stacked bar charts of responses about factors influencing prescribing decisions, barriers to appropriate prescribing, and helpfulness of measures (corresponds with Figure 3). ....                                                                  | 18 |
| <b>Supplementary Table 7.</b> Relative extent to which the listed factors influence decisions whether or not to prescribe antibiotics and Kruskal-Wallis test results (Figure 3a data). ....                                                                                        | 19 |
| <b>Supplementary Table 8.</b> Relative extent to which respondents perceived the listed factors as barriers to prescribing antibiotics appropriately and Kruskal-Wallis test results (Figure 3b data). ....                                                                         | 21 |
| <b>Supplementary Table 9.</b> Relative extent to which the listed measures were perceived as helpful to supporting appropriate prescribing and Kruskal-Wallis test results (Figure 3c data). ....                                                                                   | 24 |

### Additional details on recruitment and data collection

Respondents were reached through various channels including organisations, professional associations, and colleges via their newsletters, bulletins, forum announcements, and websites that targeted their membership and contacts (Supplementary Table 1). Other organisations and individuals who assisted with circulation of the survey (and may have been notified indirectly of the survey through a process of ‘passive snowballing’) may not be listed below.

**Supplementary Table 1. Channels and modes through which potential participants were notified of the online survey.**

| ORGANISATION/ASSOCIATION/COLLEGE:                                                                                                                                                                | Mode of recruitment/ notification:                        |
|--------------------------------------------------------------------------------------------------------------------------------------------------------------------------------------------------|-----------------------------------------------------------|
| <b>GENERAL PRACTITIONERS (GPs) ACROSS AUSTRALIA WERE NOTIFIED VIA:</b>                                                                                                                           |                                                           |
| PHCRIS                                                                                                                                                                                           | Newsletter                                                |
| NPS MedicineWise                                                                                                                                                                                 | Newsletter                                                |
| Royal Australian College of General Practitioners (RACGP) – Western Australian and Special Interests branches                                                                                    | Newsletter                                                |
| Australian Medical Association (AMA) – Federal branch                                                                                                                                            | GP News bulletin                                          |
| GP Partners Australia (South Australia)                                                                                                                                                          | Newsletter                                                |
| ‘Australian Doctor’ and ‘6-minute Doctor’ publications                                                                                                                                           | Website item                                              |
| Australian Health Practitioner Regulation Agency (AHPRA) – Medical Board of Australia                                                                                                            | Newsletter                                                |
| Primary Health Networks (PHNs) in all states: At least one PHN assisted in each state and territory. (Not all PHNs that were approached, agreed to assist)                                       | Various: Newsletter items, email broadcast, website items |
| Australian Association of Practice Management Ltd                                                                                                                                                | Website item                                              |
| Department of Health, Office of Health Protection contacts (National AMR Strategy)                                                                                                               | Email items                                               |
| Other mailing lists and publications of researchers’ contacts                                                                                                                                    | Email items                                               |
| <b>HOSPITAL-BASED DOCTORS ACROSS AUSTRALIA WERE NOTIFIED VIA:</b>                                                                                                                                |                                                           |
| Royal Australian College of Physicians                                                                                                                                                           | Newsletter                                                |
| Royal Australasian College of Surgeons                                                                                                                                                           | Newsletter/website item                                   |
| Australian Paediatric Surveillance Unit                                                                                                                                                          | Newsletter/website item                                   |
| Australian Health Practitioner Regulation Agency (AHPRA) – Medical Board of Australia                                                                                                            | Newsletter                                                |
| Department of Health, Office of Health Protection contacts (National AMR Strategy)                                                                                                               | Email items                                               |
| Other mailing lists and publications of researchers’ contacts                                                                                                                                    | Email items                                               |
| <b>DENTISTS ACROSS AUSTRALIA WERE NOTIFIED VIA:</b>                                                                                                                                              |                                                           |
| Australian Dental Association (ADA) branches in: New South Wales, Western Australia, South Australia, Queensland, Northern Territory, Tasmania.                                                  | Various: Newsletter items, email broadcast, website items |
| Royal Australasian College of Dental Surgeons                                                                                                                                                    | Online item                                               |
| The University of Sydney Continuing Education in Dentistry                                                                                                                                       | Newsletter                                                |
| ‘Australasian Dentist’ publication                                                                                                                                                               | Email broadcast service                                   |
| Other mailing lists and publications of researchers’ contacts                                                                                                                                    | Email items                                               |
| <b>VETERINARIANS ACROSS AUSTRALIA WERE NOTIFIED VIA:</b>                                                                                                                                         |                                                           |
| Australian Veterinary Association (AVA)                                                                                                                                                          | Newsletter                                                |
| The University of Sydney Centre for Veterinary Education                                                                                                                                         | Newsletter                                                |
| Veterinary Practitioners and Surgeons Boards in the following states: New South Wales, Australian Capital Territory, Western Australia, Tasmania, Northern Territory, Victoria, South Australia. | Various: Newsletter items, email broadcast, website items |
| Department of Health, Office of Health Protection contacts (National AMR Strategy)                                                                                                               | Email items                                               |
| Other mailing lists and publications of researchers’ contacts                                                                                                                                    | Email items                                               |

# **Supplementary Figure 1. Stacked bar charts of responses regarding knowledge and beliefs about antibiotic resistance (corresponds with Figure 1a), and perceptions of drivers contributing to the issue of antibiotic resistance (corresponds with Figure 1b).**

Survey question: For each of the following statements, please indicate to what extent you agree/disagree with the statement.

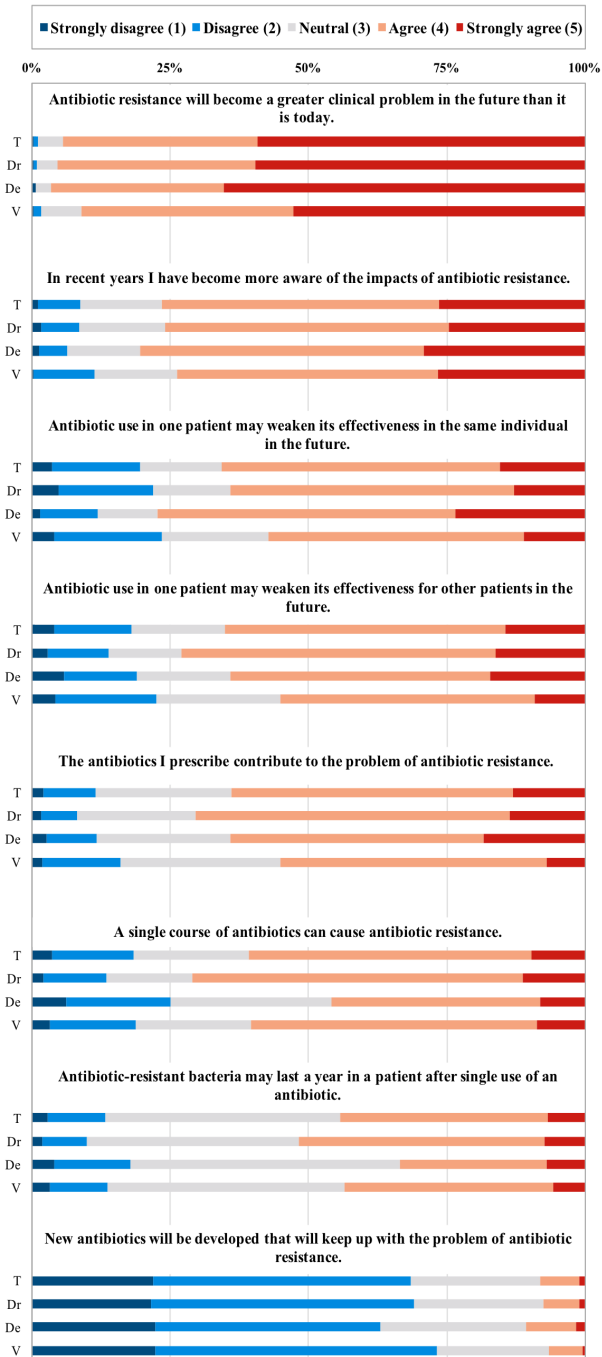

T – Total survey sample  
Dr – Doctors  
De – Dentists  
V – Veterinarians

Survey question: To what extent do you think the following factors contribute to the issue of antibiotic resistance?

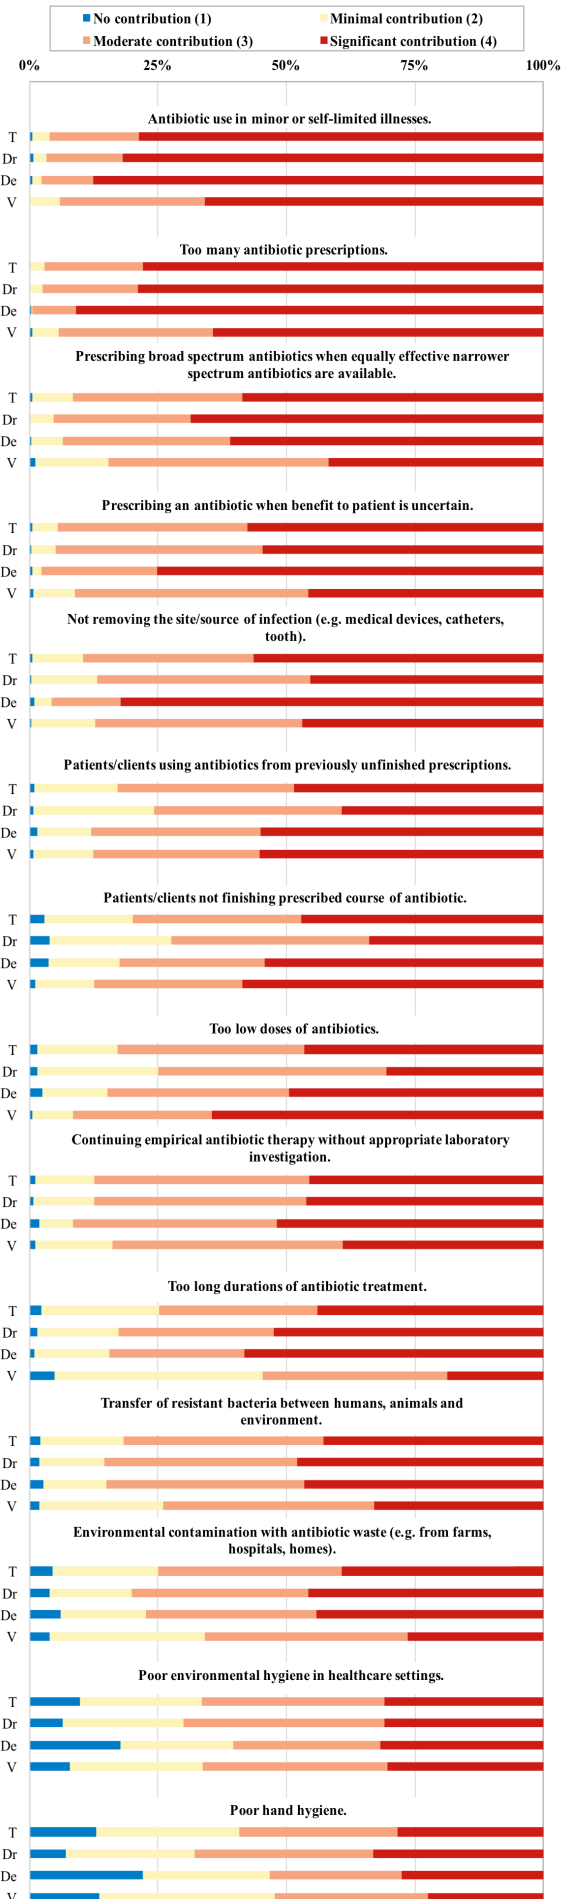

**Supplementary Table 2. Relative extent to which respondents agreed/disagreed with statements about antibiotic resistance and Kruskal-Wallis test results (Figure 1a data).**

| Survey question: For each of the following statements, please indicate to what extent you agree/disagree with the statement. |                       |     |              |      |             |      |           |      |                    |      |             |       |         |              |           |                |                    |  |
|------------------------------------------------------------------------------------------------------------------------------|-----------------------|-----|--------------|------|-------------|------|-----------|------|--------------------|------|-------------|-------|---------|--------------|-----------|----------------|--------------------|--|
|                                                                                                                              | Responses             |     |              |      |             |      |           |      |                    |      |             |       |         |              |           |                |                    |  |
|                                                                                                                              | Strongly disagree (1) |     | Disagree (2) |      | Neutral (3) |      | Agree (4) |      | Strongly agree (5) |      | Valid Total | Total | Missing | Median (IQR) | Mean rank | P <sup>¶</sup> | Group <sup>§</sup> |  |
|                                                                                                                              | n                     | %   | n            | %    | n           | %    | n         | %    | n                  | %    |             |       |         |              |           |                |                    |  |
| Antibiotic resistance will become a greater clinical problem in the future than it is today.                                 |                       |     |              |      |             |      |           |      |                    |      |             |       |         |              |           |                |                    |  |
| Total                                                                                                                        | 4                     | 0.3 | 8            | 0.7  | 57          | 4.6  | 432       | 35.2 | 726                | 59.2 | 1227        | 1330  | 103     | 5 (1)        | -         | 0.001          | -                  |  |
| Doctor                                                                                                                       | 1                     | 0.2 | 3            | 0.6  | 20          | 3.9  | 183       | 35.7 | 306                | 59.6 | 513         | 547   | 34      | 5 (1)        | 619       | -              | a                  |  |
| Dentist                                                                                                                      | 2                     | 0.6 | 0            | 0.0  | 10          | 2.9  | 107       | 31.1 | 225                | 65.4 | 344         | 380   | 36      | 5 (1)        | 655       | -              | a                  |  |
| Veterinarian                                                                                                                 | 1                     | 0.3 | 5            | 1.4  | 27          | 7.3  | 142       | 38.4 | 195                | 52.7 | 370         | 403   | 33      | 5 (1)        | 568       | -              | b                  |  |
| In recent years I have become more aware of the impacts of antibiotic resistance.                                            |                       |     |              |      |             |      |           |      |                    |      |             |       |         |              |           |                |                    |  |
| Total                                                                                                                        | 13                    | 1.1 | 95           | 7.7  | 180         | 14.7 | 615       | 50.1 | 325                | 26.5 | 1228        | 1330  | 102     | 4 (1)        | -         | 0.113          | -                  |  |
| Doctor                                                                                                                       | 8                     | 1.6 | 36           | 7.0  | 80          | 15.6 | 263       | 51.3 | 126                | 24.6 | 513         | 547   | 34      | 4 (0)        | 603       | -              | -                  |  |
| Dentist                                                                                                                      | 4                     | 1.2 | 18           | 5.2  | 45          | 13.1 | 177       | 51.5 | 100                | 29.1 | 344         | 380   | 36      | 4 (1)        | 646       | -              | -                  |  |
| Veterinarian                                                                                                                 | 1                     | 0.3 | 41           | 11.1 | 55          | 14.8 | 175       | 47.2 | 99                 | 26.7 | 371         | 403   | 32      | 4 (2)        | 602       | -              | -                  |  |
| Antibiotic use in one patient may weaken its effectiveness in the same individual in the future.                             |                       |     |              |      |             |      |           |      |                    |      |             |       |         |              |           |                |                    |  |
| Total                                                                                                                        | 45                    | 3.7 | 196          | 15.9 | 181         | 14.7 | 621       | 50.4 | 188                | 15.3 | 1231        | 1330  | 99      | 4 (1)        | -         | <0.001         | -                  |  |
| Doctor                                                                                                                       | 25                    | 4.9 | 88           | 17.1 | 72          | 14.0 | 264       | 51.3 | 66                 | 12.8 | 515         | 547   | 32      | 4 (1)        | 594       | -              | a                  |  |
| Dentist                                                                                                                      | 5                     | 1.5 | 36           | 10.5 | 37          | 10.8 | 185       | 53.8 | 81                 | 23.5 | 344         | 380   | 36      | 4 (0)        | 713       | -              | b                  |  |
| Veterinarian                                                                                                                 | 15                    | 4.0 | 72           | 19.4 | 72          | 19.4 | 172       | 46.2 | 41                 | 11.0 | 372         | 403   | 31      | 4 (1)        | 557       | -              | a                  |  |
| Antibiotic use in one patient may weaken its effectiveness for other patients in the future.                                 |                       |     |              |      |             |      |           |      |                    |      |             |       |         |              |           |                |                    |  |
| Total                                                                                                                        | 51                    | 4.1 | 169          | 13.8 | 209         | 17.0 | 624       | 50.8 | 176                | 14.3 | 1229        | 1330  | 101     | 4 (1)        | -         | <0.001         | -                  |  |
| Doctor                                                                                                                       | 15                    | 2.9 | 56           | 10.9 | 68          | 13.2 | 292       | 56.8 | 83                 | 16.1 | 514         | 547   | 33      | 4 (1)        | 664       | -              | a                  |  |
| Dentist                                                                                                                      | 20                    | 5.8 | 45           | 13.1 | 58          | 16.9 | 161       | 46.9 | 59                 | 17.2 | 343         | 380   | 37      | 4 (1)        | 619       | -              | a                  |  |
| Veterinarian                                                                                                                 | 16                    | 4.3 | 68           | 18.3 | 83          | 22.3 | 171       | 46.0 | 34                 | 9.1  | 372         | 403   | 31      | 4 (1)        | 544       | -              | b                  |  |
| The antibiotics I prescribe contribute to the problem of antibiotic resistance.                                              |                       |     |              |      |             |      |           |      |                    |      |             |       |         |              |           |                |                    |  |
| Total                                                                                                                        | 24                    | 2.0 | 117          | 9.6  | 300         | 24.5 | 625       | 51.0 | 159                | 13.0 | 1225        | 1330  | 105     | 4 (1)        | -         | <0.001         | -                  |  |
| Doctor                                                                                                                       | 8                     | 1.6 | 34           | 6.6  | 110         | 21.4 | 291       | 56.7 | 70                 | 13.6 | 513         | 547   | 34      | 4 (1)        | 652       | -              | a                  |  |
| Dentist                                                                                                                      | 9                     | 2.6 | 31           | 9.0  | 83          | 24.2 | 157       | 45.8 | 63                 | 18.4 | 343         | 380   | 37      | 4 (1)        | 634       | -              | a                  |  |
| Veterinarian                                                                                                                 | 7                     | 1.9 | 52           | 14.1 | 107         | 29.0 | 177       | 48.0 | 26                 | 7.0  | 369         | 403   | 34      | 4 (1)        | 539       | -              | b                  |  |
| A single course of antibiotics can cause antibiotic resistance.                                                              |                       |     |              |      |             |      |           |      |                    |      |             |       |         |              |           |                |                    |  |
| Total                                                                                                                        | 44                    | 3.6 | 181          | 14.7 | 257         | 20.9 | 628       | 51.1 | 118                | 9.6  | 1228        | 1330  | 102     | 4 (1)        | -         | <0.001         | -                  |  |

| Survey question: For each of the following statements, please indicate to what extent you agree/disagree with the statement.                                                                                                                                                                       |                       |      |              |      |             |      |           |      |                    |      |             |       |         |              |           |                |                    |
|----------------------------------------------------------------------------------------------------------------------------------------------------------------------------------------------------------------------------------------------------------------------------------------------------|-----------------------|------|--------------|------|-------------|------|-----------|------|--------------------|------|-------------|-------|---------|--------------|-----------|----------------|--------------------|
|                                                                                                                                                                                                                                                                                                    | Responses             |      |              |      |             |      |           |      |                    |      |             |       |         |              |           |                |                    |
|                                                                                                                                                                                                                                                                                                    | Strongly disagree (1) |      | Disagree (2) |      | Neutral (3) |      | Agree (4) |      | Strongly agree (5) |      | Valid Total | Total | Missing | Median (IQR) | Mean rank | P <sup>¶</sup> | Group <sup>§</sup> |
|                                                                                                                                                                                                                                                                                                    | n                     | %    | n            | %    | n           | %    | n         | %    | n                  | %    |             |       |         |              |           |                |                    |
| Doctor                                                                                                                                                                                                                                                                                             | 11                    | 2.1  | 58           | 11.3 | 80          | 15.6 | 306       | 59.6 | 58                 | 11.3 | 513         | 547   | 34      | 4 (1)        | 678       | -              | a                  |
| Dentist                                                                                                                                                                                                                                                                                            | 21                    | 6.1  | 65           | 18.9 | 100         | 29.1 | 130       | 37.8 | 28                 | 8.1  | 344         | 380   | 36      | 3 (1.5)      | 526       | -              | b                  |
| Veterinarian                                                                                                                                                                                                                                                                                       | 12                    | 3.2  | 58           | 15.6 | 77          | 20.8 | 192       | 51.8 | 32                 | 8.6  | 371         | 403   | 32      | 4 (1)        | 608       | -              | c                  |
| Antibiotic-resistant bacteria may last a year in a patient after single use of an antibiotic.                                                                                                                                                                                                      |                       |      |              |      |             |      |           |      |                    |      |             |       |         |              |           |                |                    |
| Total                                                                                                                                                                                                                                                                                              | 35                    | 2.9  | 128          | 10.4 | 521         | 42.5 | 459       | 37.4 | 83                 | 6.8  | 1226        | 1330  | 104     | 3 (1)        | -         | <0.001         | -                  |
| Doctor                                                                                                                                                                                                                                                                                             | 9                     | 1.8  | 42           | 8.2  | 196         | 38.2 | 228       | 44.4 | 38                 | 7.4  | 513         | 547   | 34      | 4 (1)        | 664       | -              | a                  |
| Dentist                                                                                                                                                                                                                                                                                            | 14                    | 4.1  | 47           | 13.7 | 167         | 48.7 | 91        | 26.5 | 24                 | 7.0  | 343         | 380   | 37      | 3 (1)        | 546       | -              | b                  |
| Veterinarian                                                                                                                                                                                                                                                                                       | 12                    | 3.2  | 39           | 10.5 | 158         | 42.7 | 140       | 37.8 | 21                 | 5.7  | 370         | 403   | 33      | 3 (1)        | 605       | -              | b                  |
| New antibiotics will be developed that will keep up with the problem of antibiotic resistance.                                                                                                                                                                                                     |                       |      |              |      |             |      |           |      |                    |      |             |       |         |              |           |                |                    |
| Total                                                                                                                                                                                                                                                                                              | 269                   | 22.0 | 571          | 46.6 | 285         | 23.3 | 87        | 7.1  | 13                 | 1.1  | 1225        | 1330  | 105     | 2 (1)        | -         | 0.106          | -                  |
| Doctor                                                                                                                                                                                                                                                                                             | 111                   | 21.6 | 243          | 47.4 | 120         | 23.4 | 34        | 6.6  | 5                  | 1.0  | 513         | 547   | 34      | 2 (1)        | 611       | -              | -                  |
| Dentist                                                                                                                                                                                                                                                                                            | 76                    | 22.2 | 140          | 40.8 | 90          | 26.2 | 31        | 9.0  | 6                  | 1.7  | 343         | 380   | 37      | 2 (1)        | 641       | -              | -                  |
| Veterinarian                                                                                                                                                                                                                                                                                       | 82                    | 22.2 | 188          | 50.9 | 75          | 20.3 | 22        | 6.0  | 2                  | 0.5  | 369         | 403   | 34      | 2 (1)        | 589       | -              | -                  |
| ¶ Kruskal-Wallis test P-value                                                                                                                                                                                                                                                                      |                       |      |              |      |             |      |           |      |                    |      |             |       |         |              |           |                |                    |
| § Groups with letters in common are not significantly different (P-value of pairwise comparison >0.05); Groups with different letters are significantly different (P-value of comparison >0.05); Groups with different letters are significantly different (P-value of pairwise comparison <0.05). |                       |      |              |      |             |      |           |      |                    |      |             |       |         |              |           |                |                    |

**Supplementary Table 3. Relative extent to which respondents believed the listed factors as contributing to the issue of antibiotic resistance and Kruskal-Wallis test results (Figure 1b data).**

| Survey question: To what extent do you think the following factors contribute to the issue of antibiotic resistance? |                     |     |                          |      |                           |      |                              |      |             |       |        |         |              |           |                |                    |
|----------------------------------------------------------------------------------------------------------------------|---------------------|-----|--------------------------|------|---------------------------|------|------------------------------|------|-------------|-------|--------|---------|--------------|-----------|----------------|--------------------|
|                                                                                                                      | Responses           |     |                          |      |                           |      |                              |      |             |       |        |         | Median (IQR) | Mean rank | P <sup>¶</sup> | Group <sup>§</sup> |
|                                                                                                                      | No contribution (1) |     | Minimal contribution (2) |      | Moderate contribution (3) |      | Significant contribution (4) |      | Valid Total | Total | Unsure | Missing |              |           |                |                    |
|                                                                                                                      | n                   | %   | n                        | %    | n                         | %    | n                            | %    |             |       |        |         |              |           |                |                    |
| Antibiotic use in minor or self-limited illnesses.                                                                   |                     |     |                          |      |                           |      |                              |      |             |       |        |         |              |           |                |                    |
| Total                                                                                                                | 6                   | 0.5 | 40                       | 3.3  | 209                       | 17.4 | 943                          | 78.7 | 1198        | 1330  | 14     | 118     | 4 (0)        | -         | <0.001         | -                  |
| Doctor                                                                                                               | 4                   | 0.8 | 13                       | 2.6  | 74                        | 14.7 | 412                          | 81.9 | 503         | 547   | 2      | 42      | 4 (0)        | 618       | -              | a                  |
| Dentist                                                                                                              | 2                   | 0.6 | 6                        | 1.8  | 33                        | 9.9  | 294                          | 87.8 | 335         | 380   | 6      | 39      | 4 (0)        | 653       | -              | a                  |
| Veterinarian                                                                                                         | 0                   | 0.0 | 21                       | 5.8  | 102                       | 28.3 | 237                          | 65.8 | 360         | 403   | 6      | 37      | 4 (1)        | 523       | -              | b                  |
| Too many antibiotic prescriptions.                                                                                   |                     |     |                          |      |                           |      |                              |      |             |       |        |         |              |           |                |                    |
| Total                                                                                                                | 3                   | 0.2 | 32                       | 2.7  | 231                       | 19.1 | 941                          | 78.0 | 1207        | 1330  | 10     | 113     | 4 (0)        | -         | <0.001         | -                  |
| Doctor                                                                                                               | 0                   | 0.0 | 13                       | 2.6  | 93                        | 18.4 | 399                          | 79.0 | 505         | 547   | 3      | 39      | 4 (0)        | 611       | -              | a                  |
| Dentist                                                                                                              | 1                   | 0.3 | 1                        | 0.3  | 29                        | 8.5  | 309                          | 90.9 | 340         | 380   | 1      | 39      | 4 (0)        | 683       | -              | b                  |
| Veterinarian                                                                                                         | 2                   | 0.6 | 18                       | 5.0  | 109                       | 30.1 | 233                          | 64.4 | 362         | 403   | 6      | 35      | 4 (1)        | 521       | -              | c                  |
| Prescribing broad spectrum antibiotics when equally effective narrower spectrum antibiotics are available.           |                     |     |                          |      |                           |      |                              |      |             |       |        |         |              |           |                |                    |
| Total                                                                                                                | 6                   | 0.5 | 93                       | 7.9  | 391                       | 33.1 | 690                          | 58.5 | 1180        | 1330  | 35     | 115     | 4 (1)        | -         | <0.001         | -                  |
| Doctor                                                                                                               | 1                   | 0.2 | 22                       | 4.4  | 133                       | 26.7 | 343                          | 68.7 | 499         | 547   | 7      | 41      | 4 (1)        | 655       | -              | a                  |
| Dentist                                                                                                              | 1                   | 0.3 | 20                       | 6.2  | 106                       | 32.6 | 198                          | 60.9 | 325         | 380   | 16     | 39      | 4 (1)        | 609       | -              | a                  |
| Veterinarian                                                                                                         | 4                   | 1.1 | 51                       | 14.3 | 152                       | 42.7 | 149                          | 41.9 | 356         | 403   | 12     | 35      | 3 (1)        | 483       | -              | b                  |
| Prescribing an antibiotic when benefit to patient is uncertain.                                                      |                     |     |                          |      |                           |      |                              |      |             |       |        |         |              |           |                |                    |
| Total                                                                                                                | 7                   | 0.6 | 58                       | 4.9  | 440                       | 36.9 | 688                          | 57.7 | 1193        | 1330  | 22     | 115     | 4 (1)        | -         | <0.001         | -                  |
| Doctor                                                                                                               | 2                   | 0.4 | 23                       | 4.6  | 203                       | 40.4 | 274                          | 54.6 | 502         | 547   | 5      | 40      | 4 (1)        | 581       | -              | a                  |
| Dentist                                                                                                              | 2                   | 0.6 | 6                        | 1.8  | 75                        | 22.5 | 251                          | 75.1 | 334         | 380   | 6      | 40      | 4 (0)        | 703       | -              | b                  |
| Veterinarian                                                                                                         | 3                   | 0.8 | 29                       | 8.1  | 162                       | 45.4 | 163                          | 45.7 | 357         | 403   | 11     | 35      | 3 (1)        | 520       | -              | c                  |
| Not removing the site/source of infection (e.g. medical devices, catheters, tooth).                                  |                     |     |                          |      |                           |      |                              |      |             |       |        |         |              |           |                |                    |
| Total                                                                                                                | 6                   | 0.5 | 114                      | 10.0 | 379                       | 33.1 | 645                          | 56.4 | 1144        | 1330  | 70     | 116     | 4 (1)        | -         | <0.001         | -                  |
| Doctor                                                                                                               | 2                   | 0.4 | 60                       | 12.7 | 197                       | 41.6 | 215                          | 45.4 | 474         | 547   | 32     | 41      | 3 (1)        | 510       | -              | a                  |
| Dentist                                                                                                              | 3                   | 0.9 | 11                       | 3.4  | 44                        | 13.5 | 269                          | 82.3 | 327         | 380   | 14     | 39      | 4 (0)        | 720       | -              | b                  |
| Veterinarian                                                                                                         | 1                   | 0.3 | 43                       | 12.5 | 138                       | 40.2 | 161                          | 46.9 | 343         | 403   | 24     | 36      | 3 (1)        | 519       | -              | a                  |
| Patients/clients using antibiotics from                                                                              |                     |     |                          |      |                           |      |                              |      |             |       |        |         |              |           |                |                    |

| Survey question: To what extent do you think the following factors contribute to the issue of antibiotic resistance? |                     |     |                          |      |                           |      |                              |      |             |       |        |         |              |           |                |                    |
|----------------------------------------------------------------------------------------------------------------------|---------------------|-----|--------------------------|------|---------------------------|------|------------------------------|------|-------------|-------|--------|---------|--------------|-----------|----------------|--------------------|
|                                                                                                                      | Responses           |     |                          |      |                           |      |                              |      |             |       |        |         | Median (IQR) | Mean rank | P <sup>¶</sup> | Group <sup>§</sup> |
|                                                                                                                      | No contribution (1) |     | Minimal contribution (2) |      | Moderate contribution (3) |      | Significant contribution (4) |      | Valid Total | Total | Unsure | Missing |              |           |                |                    |
|                                                                                                                      | n                   | %   | n                        | %    | n                         | %    | n                            | %    |             |       |        |         |              |           |                |                    |
| previously unfinished prescriptions.                                                                                 |                     |     |                          |      |                           |      |                              |      |             |       |        |         |              |           |                |                    |
| Total                                                                                                                | 12                  | 1.0 | 189                      | 16.2 | 400                       | 34.3 | 566                          | 48.5 | 1167        | 1330  | 48     | 115     | 3 (1)        | -         | <0.001         | -                  |
| Doctor                                                                                                               | 4                   | 0.8 | 114                      | 23.5 | 177                       | 36.5 | 190                          | 39.2 | 485         | 547   | 22     | 40      | 3 (1)        | 518       | -              | a                  |
| Dentist                                                                                                              | 5                   | 1.5 | 34                       | 10.5 | 107                       | 33.0 | 178                          | 54.9 | 324         | 380   | 17     | 39      | 4 (1)        | 630       | -              | b                  |
| Veterinarian                                                                                                         | 3                   | 0.8 | 41                       | 11.5 | 116                       | 32.4 | 198                          | 55.3 | 358         | 403   | 9      | 36      | 4 (1)        | 632       | -              | b                  |
| Patients/clients not finishing prescribed course of antibiotic.                                                      |                     |     |                          |      |                           |      |                              |      |             |       |        |         |              |           |                |                    |
| Total                                                                                                                | 35                  | 3.0 | 199                      | 17.2 | 379                       | 32.7 | 547                          | 47.2 | 1160        | 1330  | 52     | 118     | 3 (1)        | -         | <0.001         | -                  |
| Doctor                                                                                                               | 19                  | 3.9 | 114                      | 23.6 | 186                       | 38.5 | 164                          | 34.0 | 483         | 547   | 23     | 41      | 3 (2)        | 497       | -              | a                  |
| Dentist                                                                                                              | 12                  | 3.8 | 44                       | 13.8 | 90                        | 28.1 | 174                          | 54.4 | 320         | 380   | 20     | 40      | 4 (1)        | 621       | -              | b                  |
| Veterinarian                                                                                                         | 4                   | 1.1 | 41                       | 11.5 | 103                       | 28.9 | 209                          | 58.5 | 357         | 403   | 9      | 37      | 4 (1)        | 657       | -              | b                  |
| Too low doses of antibiotics.                                                                                        |                     |     |                          |      |                           |      |                              |      |             |       |        |         |              |           |                |                    |
| Total                                                                                                                | 17                  | 1.5 | 176                      | 15.6 | 411                       | 36.4 | 524                          | 46.5 | 1128        | 1330  | 84     | 118     | 3 (1)        | -         | <0.001         | -                  |
| Doctor                                                                                                               | 7                   | 1.5 | 110                      | 23.6 | 207                       | 44.4 | 142                          | 30.5 | 466         | 547   | 39     | 42      | 3 (2)        | 466       | -              | a                  |
| Dentist                                                                                                              | 8                   | 2.6 | 38                       | 12.5 | 107                       | 35.3 | 150                          | 49.5 | 303         | 380   | 37     | 40      | 3 (1)        | 583       | -              | b                  |
| Veterinarian                                                                                                         | 2                   | 0.6 | 28                       | 7.8  | 97                        | 27.0 | 232                          | 64.6 | 359         | 403   | 8      | 36      | 4 (1)        | 676       | -              | c                  |
| Continuing empirical antibiotic therapy without appropriate laboratory investigation.                                |                     |     |                          |      |                           |      |                              |      |             |       |        |         |              |           |                |                    |
| Total                                                                                                                | 14                  | 1.2 | 132                      | 11.4 | 486                       | 41.9 | 528                          | 45.5 | 1160        | 1330  | 54     | 116     | 3 (1)        | -         | 0.001          | -                  |
| Doctor                                                                                                               | 4                   | 0.8 | 58                       | 11.8 | 202                       | 41.1 | 227                          | 46.2 | 491         | 547   | 15     | 41      | 3 (1)        | 584       | -              | a,b                |
| Dentist                                                                                                              | 6                   | 1.9 | 20                       | 6.5  | 122                       | 39.6 | 160                          | 51.9 | 308         | 380   | 32     | 40      | 4 (1)        | 625       | -              | a                  |
| Veterinarian                                                                                                         | 4                   | 1.1 | 54                       | 15.0 | 162                       | 44.9 | 141                          | 39.1 | 361         | 403   | 7      | 35      | 3 (1)        | 537       | -              | b                  |
| Too long durations of antibiotic treatment.                                                                          |                     |     |                          |      |                           |      |                              |      |             |       |        |         |              |           |                |                    |
| Total                                                                                                                | 27                  | 2.4 | 258                      | 22.8 | 349                       | 30.8 | 499                          | 44.0 | 1133        | 1330  | 82     | 115     | 3 (2)        | -         | <0.001         | -                  |
| Doctor                                                                                                               | 8                   | 1.6 | 77                       | 15.8 | 146                       | 30.0 | 255                          | 52.5 | 486         | 547   | 22     | 39      | 4 (1)        | 627       | -              | a                  |
| Dentist                                                                                                              | 3                   | 1.0 | 45                       | 14.5 | 82                        | 26.4 | 181                          | 58.2 | 311         | 380   | 29     | 40      | 4 (1)        | 659       | -              | a                  |
| Veterinarian                                                                                                         | 16                  | 4.8 | 136                      | 40.5 | 121                       | 36.0 | 63                           | 18.8 | 336         | 403   | 31     | 36      | 3 (1)        | 395       | -              | b                  |
| Transfer of resistant bacteria between humans, animals and environment.                                              |                     |     |                          |      |                           |      |                              |      |             |       |        |         |              |           |                |                    |
| Total                                                                                                                | 24                  | 2.2 | 177                      | 16.1 | 427                       | 38.9 | 470                          | 42.8 | 1098        | 1330  | 112    | 120     | 3 (1)        | -         | <0.001         | -                  |
| Doctor                                                                                                               | 9                   | 2.0 | 58                       | 12.6 | 172                       | 37.4 | 221                          | 48.0 | 460         | 547   | 46     | 41      | 3 (1)        | 585       | -              | a                  |
| Dentist                                                                                                              | 8                   | 2.8 | 35                       | 12.2 | 111                       | 38.5 | 134                          | 46.5 | 288         | 380   | 49     | 43      | 3 (1)        | 576       | -              | a                  |

| Survey question: To what extent do you think the following factors contribute to the issue of antibiotic resistance?                                                                                                                                                                               |                     |      |                          |      |                           |      |                              |      |             |       |        |         |              |           |                |                    |
|----------------------------------------------------------------------------------------------------------------------------------------------------------------------------------------------------------------------------------------------------------------------------------------------------|---------------------|------|--------------------------|------|---------------------------|------|------------------------------|------|-------------|-------|--------|---------|--------------|-----------|----------------|--------------------|
|                                                                                                                                                                                                                                                                                                    | Responses           |      |                          |      |                           |      |                              |      |             |       |        |         | Median (IQR) | Mean rank | P <sup>¶</sup> | Group <sup>§</sup> |
|                                                                                                                                                                                                                                                                                                    | No contribution (1) |      | Minimal contribution (2) |      | Moderate contribution (3) |      | Significant contribution (4) |      | Valid Total | Total | Unsure | Missing |              |           |                |                    |
|                                                                                                                                                                                                                                                                                                    | n                   | %    | n                        | %    | n                         | %    | n                            | %    |             |       |        |         |              |           |                |                    |
| Veterinarian                                                                                                                                                                                                                                                                                       | 7                   | 2.0  | 84                       | 24.0 | 144                       | 41.1 | 115                          | 32.9 | 350         | 403   | 17     | 36      | 3 (2)        | 482       | -              | b                  |
| Environmental contamination with antibiotic waste (e.g. from farms, hospitals, homes).                                                                                                                                                                                                             |                     |      |                          |      |                           |      |                              |      |             |       |        |         |              |           |                |                    |
| Total                                                                                                                                                                                                                                                                                              | 47                  | 4.5  | 217                      | 20.6 | 375                       | 35.6 | 414                          | 39.3 | 1053        | 1330  | 159    | 118     | 3 (2)        | -         | <0.001         | -                  |
| Doctor                                                                                                                                                                                                                                                                                             | 17                  | 3.8  | 72                       | 16.1 | 153                       | 34.3 | 204                          | 45.7 | 446         | 547   | 60     | 41      | 3 (1)        | 568       | -              | a                  |
| Dentist                                                                                                                                                                                                                                                                                            | 17                  | 6.0  | 47                       | 16.7 | 93                        | 33.1 | 124                          | 44.1 | 281         | 380   | 58     | 41      | 3 (1)        | 551       | -              | a                  |
| Veterinarian                                                                                                                                                                                                                                                                                       | 13                  | 4.0  | 98                       | 30.1 | 129                       | 39.6 | 86                           | 26.4 | 326         | 403   | 41     | 36      | 3 (2)        | 450       | -              | b                  |
| Poor environmental hygiene in healthcare settings.                                                                                                                                                                                                                                                 |                     |      |                          |      |                           |      |                              |      |             |       |        |         |              |           |                |                    |
| Total                                                                                                                                                                                                                                                                                              | 107                 | 9.8  | 261                      | 23.8 | 388                       | 35.4 | 339                          | 31.0 | 1095        | 1330  | 116    | 119     | 3 (2)        | -         | 0.097          | -                  |
| Doctor                                                                                                                                                                                                                                                                                             | 30                  | 6.4  | 110                      | 23.5 | 184                       | 39.2 | 145                          | 30.9 | 469         | 547   | 37     | 41      | 3 (2)        | 566       | -              | -                  |
| Dentist                                                                                                                                                                                                                                                                                            | 50                  | 17.7 | 62                       | 21.9 | 81                        | 28.6 | 90                           | 31.8 | 283         | 380   | 56     | 41      | 3 (2)        | 517       | -              | -                  |
| Veterinarian                                                                                                                                                                                                                                                                                       | 27                  | 7.9  | 89                       | 25.9 | 123                       | 35.9 | 104                          | 30.3 | 343         | 403   | 23     | 37      | 3 (2)        | 548       | -              | -                  |
| Poor hand hygiene.                                                                                                                                                                                                                                                                                 |                     |      |                          |      |                           |      |                              |      |             |       |        |         |              |           |                |                    |
| Total                                                                                                                                                                                                                                                                                              | 141                 | 13.0 | 302                      | 27.8 | 335                       | 30.8 | 310                          | 28.5 | 1088        | 1330  | 121    | 121     | 3 (2)        | -         | <0.001         | -                  |
| Doctor                                                                                                                                                                                                                                                                                             | 33                  | 7.0  | 118                      | 25.1 | 163                       | 34.7 | 156                          | 33.2 | 470         | 547   | 35     | 42      | 3 (2)        | 600       | -              | a                  |
| Dentist                                                                                                                                                                                                                                                                                            | 63                  | 22.1 | 70                       | 24.6 | 73                        | 25.6 | 79                           | 27.7 | 285         | 380   | 53     | 42      | 3 (2)        | 503       | -              | b                  |
| Veterinarian                                                                                                                                                                                                                                                                                       | 45                  | 13.5 | 114                      | 34.2 | 99                        | 29.7 | 75                           | 22.5 | 333         | 403   | 33     | 37      | 3 (1)        | 502       | -              | b                  |
| ¶ Kruskal-Wallis test P-value                                                                                                                                                                                                                                                                      |                     |      |                          |      |                           |      |                              |      |             |       |        |         |              |           |                |                    |
| § Groups with letters in common are not significantly different (P-value of pairwise comparison >0.05); Groups with different letters are significantly different (P-value of comparison >0.05); Groups with different letters are significantly different (P-value of pairwise comparison <0.05). |                     |      |                          |      |                           |      |                              |      |             |       |        |         |              |           |                |                    |



**Supplementary Figure 2. Stacked bar charts of responses regarding beliefs about current levels of antibiotic use as drivers of antibiotic resistance (corresponds with Figure 2a), and the extent of the problem of antibiotic resistance (corresponds with Figure 2b).**

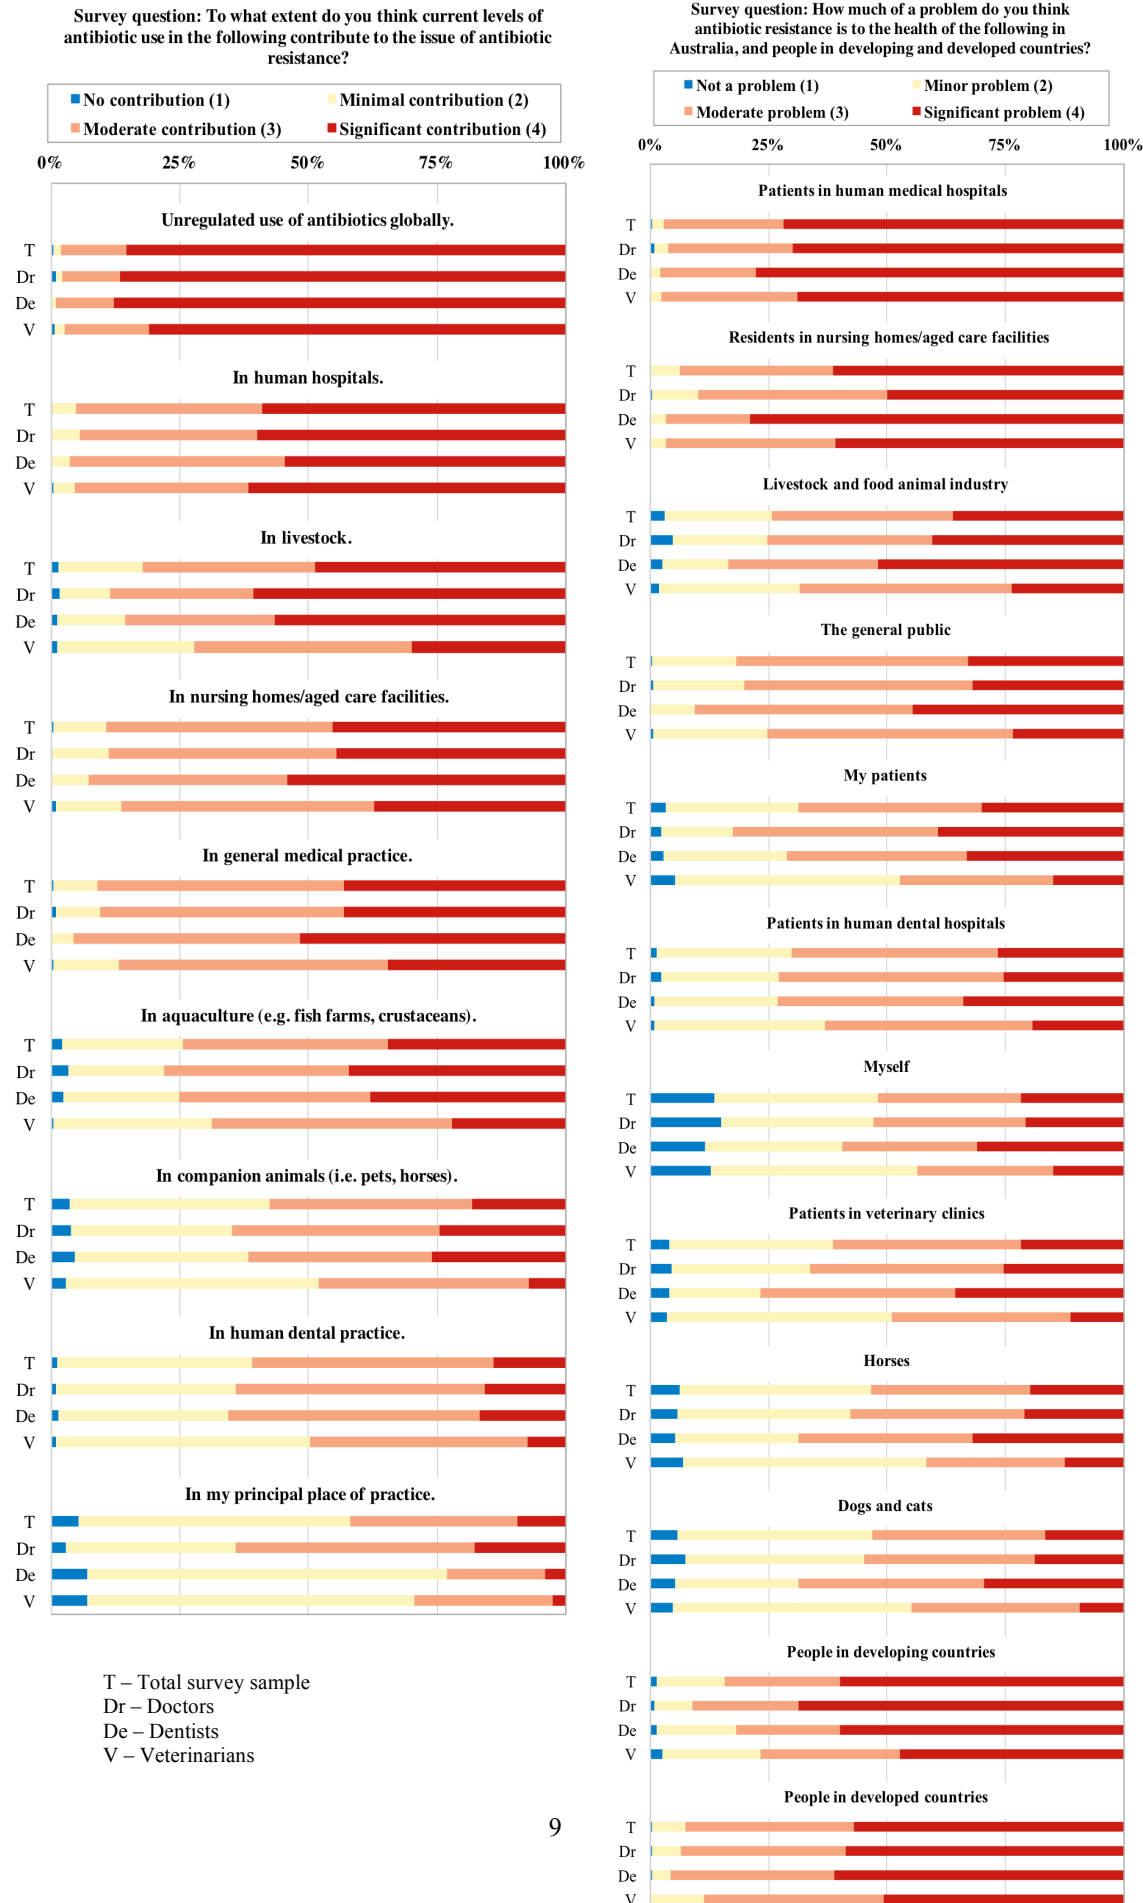

**Supplementary Figure 3. Stacked bar charts of responses regarding perceived importance of stakeholders in managing/preventing the issue of antibiotic resistance (corresponds with Figure 2c).**

T – Total survey sample  
 Dr – Doctors  
 De – Dentists  
 V – Veterinarians

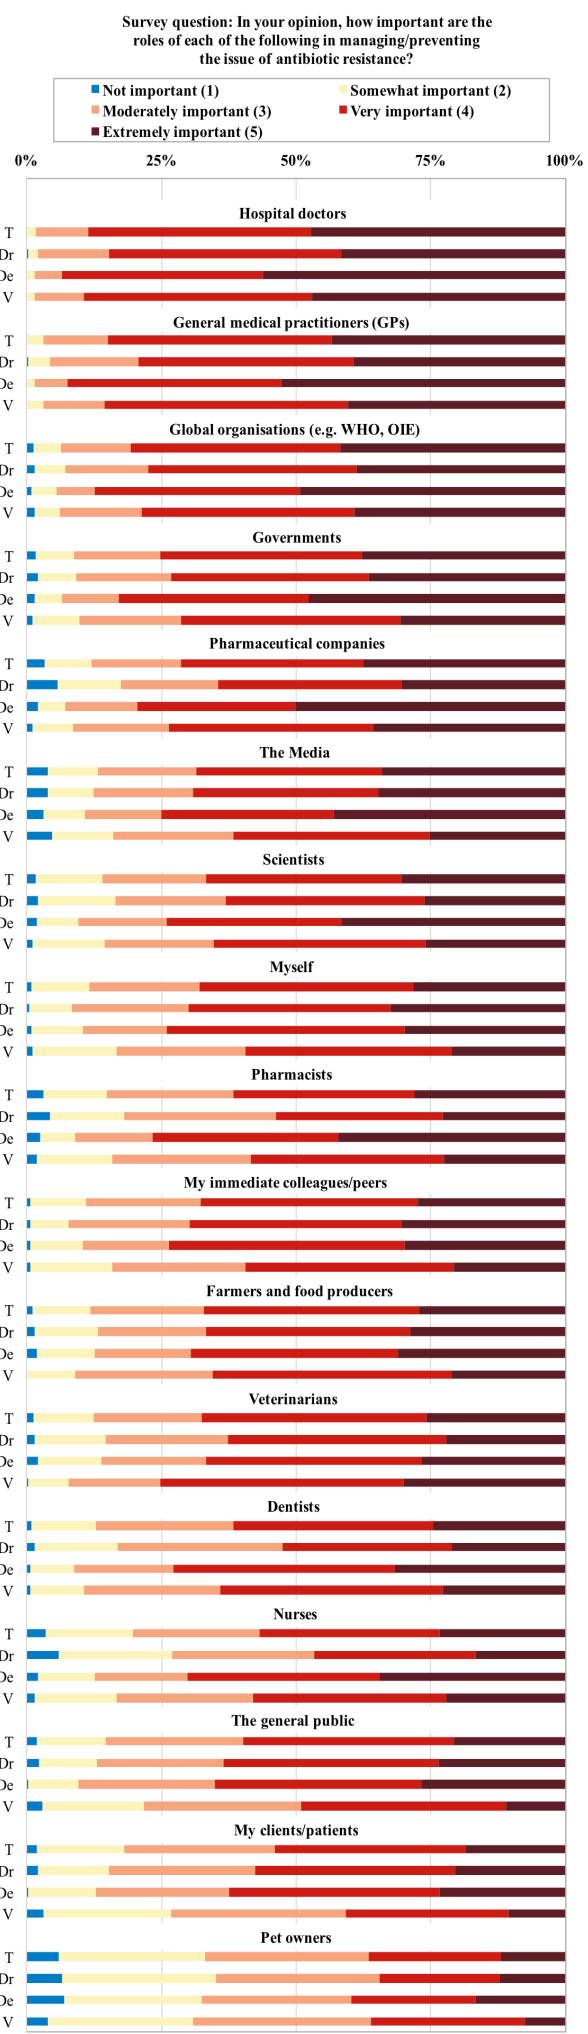

**Supplementary Table 4. Relative extent to which respondents believed that current levels of antibiotic use as contributing to antibiotic resistance and Kruskal-Wallis test results (Figure 2a data).**

| Survey question: To what extent do you think CURRENT LEVELS OF ANTIBIOTIC USE in the following contribute to the issue of antibiotic resistance? |                     |     |                          |      |                           |      |                              |      |             |       |        |         |              |           |                |                    |
|--------------------------------------------------------------------------------------------------------------------------------------------------|---------------------|-----|--------------------------|------|---------------------------|------|------------------------------|------|-------------|-------|--------|---------|--------------|-----------|----------------|--------------------|
|                                                                                                                                                  | Responses           |     |                          |      |                           |      |                              |      |             |       |        |         | Median (IQR) | Mean rank | P <sup>¶</sup> | Group <sup>§</sup> |
|                                                                                                                                                  | No contribution (1) |     | Minimal contribution (2) |      | Moderate contribution (3) |      | Significant contribution (4) |      | Valid Total | Total | Unsure | Missing |              |           |                |                    |
|                                                                                                                                                  | n                   | %   | n                        | %    | n                         | %    | n                            | %    |             |       |        |         |              |           |                |                    |
| Unregulated use of antibiotics globally.                                                                                                         |                     |     |                          |      |                           |      |                              |      |             |       |        |         |              |           |                |                    |
| Total                                                                                                                                            | 6                   | 0.5 | 16                       | 1.4  | 144                       | 12.8 | 963                          | 85.3 | 1129        | 1330  | 72     | 129     | 4 (0)        | -         | 0.021          | -                  |
| Doctor                                                                                                                                           | 4                   | 0.8 | 6                        | 1.3  | 53                        | 11.2 | 410                          | 86.7 | 473         | 547   | 29     | 45      | 4 (0)        | 572       | -              | a,b                |
| Dentist                                                                                                                                          | 0                   | 0.0 | 3                        | 1.0  | 35                        | 11.1 | 277                          | 87.9 | 315         | 380   | 22     | 43      | 4 (0)        | 580       | -              | a                  |
| Veterinarian                                                                                                                                     | 2                   | 0.6 | 7                        | 2.1  | 56                        | 16.4 | 276                          | 80.9 | 341         | 403   | 21     | 41      | 4 (0)        | 540       | -              | b                  |
| In human hospitals.                                                                                                                              |                     |     |                          |      |                           |      |                              |      |             |       |        |         |              |           |                |                    |
| Total                                                                                                                                            | 1                   | 0.1 | 51                       | 4.6  | 404                       | 36.4 | 655                          | 59.0 | 1111        | 1330  | 91     | 128     | 4 (1)        | -         | 0.245          | -                  |
| Doctor                                                                                                                                           | 0                   | 0.0 | 27                       | 5.6  | 166                       | 34.3 | 291                          | 60.1 | 484         | 547   | 19     | 44      | 4 (1)        | 560       | -              | -                  |
| Dentist                                                                                                                                          | 0                   | 0.0 | 11                       | 3.5  | 132                       | 42.0 | 171                          | 54.5 | 314         | 380   | 23     | 43      | 4 (1)        | 535       | -              | -                  |
| Veterinarian                                                                                                                                     | 1                   | 0.3 | 13                       | 4.2  | 106                       | 33.9 | 193                          | 61.7 | 313         | 403   | 49     | 41      | 4 (1)        | 571       | -              | -                  |
| In livestock.                                                                                                                                    |                     |     |                          |      |                           |      |                              |      |             |       |        |         |              |           |                |                    |
| Total                                                                                                                                            | 13                  | 1.4 | 159                      | 16.5 | 320                       | 33.3 | 470                          | 48.9 | 962         | 1330  | 242    | 126     | 3 (1)        | -         | <0.001         | -                  |
| Doctor                                                                                                                                           | 6                   | 1.6 | 37                       | 9.8  | 105                       | 27.8 | 230                          | 60.8 | 378         | 547   | 124    | 45      | 4 (1)        | 544       | -              | a                  |
| Dentist                                                                                                                                          | 3                   | 1.2 | 32                       | 13.1 | 71                        | 29.1 | 138                          | 56.6 | 244         | 380   | 93     | 43      | 4 (1)        | 520       | -              | a                  |
| Veterinarian                                                                                                                                     | 4                   | 1.2 | 90                       | 26.5 | 144                       | 42.4 | 102                          | 30.0 | 340         | 403   | 25     | 38      | 3 (2)        | 384       | -              | b                  |
| In nursing homes/aged care facilities.                                                                                                           |                     |     |                          |      |                           |      |                              |      |             |       |        |         |              |           |                |                    |
| Total                                                                                                                                            | 3                   | 0.3 | 102                      | 10.4 | 431                       | 44.0 | 444                          | 45.3 | 980         | 1330  | 220    | 130     | 3 (1)        | -         | <0.001         | -                  |
| Doctor                                                                                                                                           | 1                   | 0.2 | 49                       | 11.0 | 198                       | 44.3 | 199                          | 44.5 | 447         | 547   | 54     | 46      | 3 (1)        | 486       | -              | a                  |
| Dentist                                                                                                                                          | 0                   | 0.0 | 20                       | 7.2  | 108                       | 38.8 | 150                          | 54.0 | 278         | 380   | 58     | 44      | 4 (1)        | 538       | -              | b                  |
| Veterinarian                                                                                                                                     | 2                   | 0.8 | 33                       | 12.9 | 125                       | 49.0 | 95                           | 37.3 | 255         | 403   | 108    | 40      | 3 (1)        | 447       | -              | a                  |
| In general medical practice.                                                                                                                     |                     |     |                          |      |                           |      |                              |      |             |       |        |         |              |           |                |                    |
| Total                                                                                                                                            | 5                   | 0.4 | 98                       | 8.6  | 546                       | 47.9 | 490                          | 43.0 | 1139        | 1330  | 65     | 126     | 3 (1)        | -         | <0.001         | -                  |
| Doctor                                                                                                                                           | 4                   | 0.8 | 42                       | 8.6  | 231                       | 47.4 | 210                          | 43.1 | 487         | 547   | 17     | 43      | 3 (1)        | 569       | -              | a                  |
| Dentist                                                                                                                                          | 0                   | 0.0 | 14                       | 4.4  | 141                       | 44.1 | 165                          | 51.6 | 320         | 380   | 16     | 44      | 4 (1)        | 630       | -              | b                  |
| Veterinarian                                                                                                                                     | 1                   | 0.3 | 42                       | 12.7 | 174                       | 52.4 | 115                          | 34.6 | 332         | 403   | 32     | 39      | 3 (1)        | 514       | -              | c                  |
| In aquaculture (e.g. fish farms, crustaceans)                                                                                                    |                     |     |                          |      |                           |      |                              |      |             |       |        |         |              |           |                |                    |
| Total                                                                                                                                            | 16                  | 2.1 | 178                      | 23.6 | 300                       | 39.7 | 261                          | 34.6 | 755         | 1330  | 447    | 128     | 3 (2)        | -         | <0.001         | -                  |
| Doctor                                                                                                                                           | 10                  | 3.3 | 57                       | 18.6 | 110                       | 35.9 | 129                          | 42.2 | 306         | 547   | 196    | 45      | 3 (1)        | 407       | -              | a                  |
| Dentist                                                                                                                                          | 5                   | 2.4 | 46                       | 22.4 | 76                        | 37.1 | 78                           | 38.0 | 205         | 380   | 132    | 43      | 3 (1)        | 389       | -              | a                  |
| Veterinarian                                                                                                                                     | 1                   | 0.4 | 75                       | 30.7 | 114                       | 46.7 | 54                           | 22.1 | 244         | 403   | 119    | 40      | 3 (1)        | 332       | -              | b                  |

| Survey question: To what extent do you think CURRENT LEVELS OF ANTIBIOTIC USE in the following contribute to the issue of antibiotic resistance?                                                                                                                                                   |                     |     |                          |      |                           |      |                              |      |             |       |        |         |              |           |                |                    |
|----------------------------------------------------------------------------------------------------------------------------------------------------------------------------------------------------------------------------------------------------------------------------------------------------|---------------------|-----|--------------------------|------|---------------------------|------|------------------------------|------|-------------|-------|--------|---------|--------------|-----------|----------------|--------------------|
|                                                                                                                                                                                                                                                                                                    | Responses           |     |                          |      |                           |      |                              |      |             |       |        |         | Median (IQR) | Mean rank | P <sup>¶</sup> | Group <sup>§</sup> |
|                                                                                                                                                                                                                                                                                                    | No contribution (1) |     | Minimal contribution (2) |      | Moderate contribution (3) |      | Significant contribution (4) |      | Valid Total | Total | Unsure | Missing |              |           |                |                    |
|                                                                                                                                                                                                                                                                                                    | n                   | %   | n                        | %    | n                         | %    | n                            | %    |             |       |        |         |              |           |                |                    |
| In companion animals (i.e. pets, horses).                                                                                                                                                                                                                                                          |                     |     |                          |      |                           |      |                              |      |             |       |        |         |              |           |                |                    |
| Total                                                                                                                                                                                                                                                                                              | 33                  | 3.7 | 349                      | 38.7 | 355                       | 39.4 | 164                          | 18.2 | 901         | 1330  | 301    | 128     | 3 (1)        | -         | <0.001         | -                  |
| Doctor                                                                                                                                                                                                                                                                                             | 13                  | 3.9 | 105                      | 31.3 | 135                       | 40.3 | 82                           | 24.5 | 335         | 547   | 168    | 44      | 3 (1)        | 492       | -              | a                  |
| Dentist                                                                                                                                                                                                                                                                                            | 10                  | 4.6 | 74                       | 33.8 | 78                        | 35.6 | 57                           | 26.0 | 219         | 380   | 117    | 44      | 3 (2)        | 484       | -              | a                  |
| Veterinarian                                                                                                                                                                                                                                                                                       | 10                  | 2.9 | 170                      | 49.0 | 142                       | 40.9 | 25                           | 7.2  | 347         | 403   | 16     | 40      | 2 (1)        | 391       | -              | b                  |
| In human dental practice.                                                                                                                                                                                                                                                                          |                     |     |                          |      |                           |      |                              |      |             |       |        |         |              |           |                |                    |
| Total                                                                                                                                                                                                                                                                                              | 10                  | 1.1 | 347                      | 38.0 | 428                       | 46.9 | 127                          | 13.9 | 912         | 1330  | 290    | 128     | 3 (1)        | -         | <0.001         | -                  |
| Doctor                                                                                                                                                                                                                                                                                             | 3                   | 0.9 | 121                      | 35.1 | 167                       | 48.4 | 54                           | 15.7 | 345         | 547   | 158    | 44      | 3 (1)        | 474       | -              | a                  |
| Dentist                                                                                                                                                                                                                                                                                            | 5                   | 1.5 | 108                      | 32.9 | 160                       | 48.8 | 55                           | 16.8 | 328         | 380   | 9      | 43      | 3 (1)        | 482       | -              | a                  |
| Veterinarian                                                                                                                                                                                                                                                                                       | 2                   | 0.8 | 118                      | 49.4 | 101                       | 42.3 | 18                           | 7.5  | 239         | 403   | 123    | 41      | 2 (1)        | 396       | -              | b                  |
| In my principal place of practice.                                                                                                                                                                                                                                                                 |                     |     |                          |      |                           |      |                              |      |             |       |        |         |              |           |                |                    |
| Total                                                                                                                                                                                                                                                                                              | 62                  | 5.3 | 613                      | 52.7 | 381                       | 32.7 | 108                          | 9.3  | 1164        | 1330  | 39     | 127     | 2 (1)        | -         | <0.001         | -                  |
| Doctor                                                                                                                                                                                                                                                                                             | 14                  | 2.9 | 160                      | 33.1 | 224                       | 46.3 | 86                           | 17.8 | 484         | 547   | 19     | 44      | 3 (1)        | 721       | -              | a                  |
| Dentist                                                                                                                                                                                                                                                                                            | 23                  | 7.1 | 227                      | 69.8 | 62                        | 19.1 | 13                           | 4.0  | 325         | 380   | 11     | 44      | 2 (0)        | 470       | -              | b                  |
| Veterinarian                                                                                                                                                                                                                                                                                       | 25                  | 7.0 | 226                      | 63.7 | 95                        | 26.8 | 9                            | 2.5  | 355         | 403   | 9      | 39      | 2 (1)        | 497       | -              | b                  |
| ¶ Kruskal-Wallis test P-value                                                                                                                                                                                                                                                                      |                     |     |                          |      |                           |      |                              |      |             |       |        |         |              |           |                |                    |
| § Groups with letters in common are not significantly different (P-value of pairwise comparison >0.05); Groups with different letters are significantly different (P-value of comparison >0.05); Groups with different letters are significantly different (P-value of pairwise comparison <0.05). |                     |     |                          |      |                           |      |                              |      |             |       |        |         |              |           |                |                    |

**Supplementary Table 5. Relative extent to which respondents believed that antibiotic resistance is a problem to the health of the listed groups and individuals and Kruskal-Wallis test results (Figure 2b data).**

| Survey question: How much of a problem do you think antibiotic resistance is to the HEALTH of the following in Australia, and people in developing and developed countries? |                   |     |                   |      |                      |      |                         |      |             |       |        |         |              |           |                |                    |
|-----------------------------------------------------------------------------------------------------------------------------------------------------------------------------|-------------------|-----|-------------------|------|----------------------|------|-------------------------|------|-------------|-------|--------|---------|--------------|-----------|----------------|--------------------|
|                                                                                                                                                                             | Responses         |     |                   |      |                      |      |                         |      |             |       |        |         |              |           |                |                    |
|                                                                                                                                                                             | Not a problem (1) |     | Minor problem (2) |      | Moderate problem (3) |      | Significant problem (4) |      | Valid Total | Total | Unsure | Missing | Median (IQR) | Mean rank | P <sup>n</sup> | Group <sup>s</sup> |
|                                                                                                                                                                             | n                 | %   | n                 | %    | n                    | %    | n                       | %    |             |       |        |         |              |           |                |                    |
| Patients in human medical hospitals                                                                                                                                         |                   |     |                   |      |                      |      |                         |      |             |       |        |         |              |           |                |                    |
| Total                                                                                                                                                                       | 4                 | 0.3 | 30                | 2.6  | 294                  | 25.3 | 835                     | 71.8 | 1163        | 1330  | 41     | 126     | 4 (1)        | -         | 0.022          | -                  |
| Doctor                                                                                                                                                                      | 4                 | 0.8 | 15                | 3.0  | 131                  | 26.3 | 349                     | 69.9 | 499         | 547   | 5      | 43      | 4 (1)        | 570       | -              | a                  |
| Dentist                                                                                                                                                                     | 0                 | 0.0 | 7                 | 2.1  | 66                   | 20.2 | 253                     | 77.6 | 326         | 380   | 12     | 42      | 4 (0)        | 616       | -              | b                  |
| Veterinarian                                                                                                                                                                | 0                 | 0.0 | 8                 | 2.4  | 97                   | 28.7 | 233                     | 68.9 | 338         | 403   | 24     | 41      | 4 (1)        | 567       | -              | a                  |
| Residents in nursing homes/aged care facilities                                                                                                                             |                   |     |                   |      |                      |      |                         |      |             |       |        |         |              |           |                |                    |
| Total                                                                                                                                                                       | 2                 | 0.2 | 66                | 6.0  | 355                  | 32.4 | 672                     | 61.4 | 1095        | 1330  | 109    | 126     | 4 (1)        | -         | <0.001         | -                  |
| Doctor                                                                                                                                                                      | 2                 | 0.4 | 46                | 9.7  | 188                  | 39.8 | 236                     | 50.0 | 472         | 547   | 31     | 44      | 3.5 (1)      | 481       | -              | a                  |
| Dentist                                                                                                                                                                     | 0                 | 0.0 | 10                | 3.2  | 56                   | 17.8 | 248                     | 79.0 | 314         | 380   | 24     | 42      | 4 (0)        | 645       | -              | b                  |
| Veterinarian                                                                                                                                                                | 0                 | 0.0 | 10                | 3.2  | 111                  | 35.9 | 188                     | 60.8 | 309         | 403   | 54     | 40      | 4 (1)        | 552       | -              | c                  |
| Livestock and food animal industry                                                                                                                                          |                   |     |                   |      |                      |      |                         |      |             |       |        |         |              |           |                |                    |
| Total                                                                                                                                                                       | 23                | 3.0 | 174               | 22.6 | 295                  | 38.3 | 279                     | 36.2 | 771         | 1330  | 428    | 131     | 3 (2)        | -         | <0.001         | -                  |
| Doctor                                                                                                                                                                      | 12                | 4.8 | 50                | 20.0 | 87                   | 34.8 | 101                     | 40.4 | 250         | 547   | 252    | 45      | 3 (1)        | 398       | -              | a                  |
| Dentist                                                                                                                                                                     | 5                 | 2.6 | 27                | 13.8 | 62                   | 31.8 | 101                     | 51.8 | 195         | 380   | 139    | 46      | 4 (1)        | 453       | -              | b                  |
| Veterinarian                                                                                                                                                                | 6                 | 1.8 | 97                | 29.8 | 146                  | 44.8 | 77                      | 23.6 | 326         | 403   | 37     | 40      | 3 (1)        | 337       | -              | c                  |
| The general public                                                                                                                                                          |                   |     |                   |      |                      |      |                         |      |             |       |        |         |              |           |                |                    |
| Total                                                                                                                                                                       | 5                 | 0.4 | 207               | 17.8 | 566                  | 48.7 | 384                     | 33.0 | 1162        | 1330  | 40     | 128     | 3 (1)        | -         | <0.001         | -                  |
| Doctor                                                                                                                                                                      | 3                 | 0.6 | 94                | 19.2 | 236                  | 48.2 | 157                     | 32.0 | 490         | 547   | 12     | 45      | 3 (1)        | 571       | -              | a                  |
| Dentist                                                                                                                                                                     | 0                 | 0.0 | 31                | 9.4  | 152                  | 46.1 | 147                     | 44.5 | 330         | 380   | 8      | 42      | 3 (1)        | 671       | -              | b                  |
| Veterinarian                                                                                                                                                                | 2                 | 0.6 | 82                | 24.0 | 178                  | 52.0 | 80                      | 23.4 | 342         | 403   | 20     | 41      | 3 (0)        | 511       | -              | c                  |
| My patients                                                                                                                                                                 |                   |     |                   |      |                      |      |                         |      |             |       |        |         |              |           |                |                    |
| Total                                                                                                                                                                       | 40                | 3.4 | 331               | 27.9 | 459                  | 38.6 | 358                     | 30.1 | 1188        | 1330  | 16     | 126     | 3 (2)        | -         | <0.001         | -                  |
| Doctor                                                                                                                                                                      | 12                | 2.4 | 74                | 14.9 | 217                  | 43.6 | 195                     | 39.2 | 498         | 547   | 5      | 44      | 3 (1)        | 688       | -              | a                  |
| Dentist                                                                                                                                                                     | 9                 | 2.7 | 86                | 26.1 | 125                  | 38.0 | 109                     | 33.1 | 329         | 380   | 8      | 43      | 3 (2)        | 617       | -              | b                  |
| Veterinarian                                                                                                                                                                | 19                | 5.3 | 171               | 47.4 | 117                  | 32.4 | 54                      | 15.0 | 361         | 403   | 3      | 39      | 2 (1)        | 444       | -              | c                  |
| Patients in human dental hospitals                                                                                                                                          |                   |     |                   |      |                      |      |                         |      |             |       |        |         |              |           |                |                    |
| Total                                                                                                                                                                       | 13                | 1.4 | 261               | 28.4 | 400                  | 43.5 | 246                     | 26.7 | 920         | 1330  | 286    | 124     | 3 (2)        | -         | 0.001          | -                  |
| Doctor                                                                                                                                                                      | 8                 | 2.4 | 84                | 24.7 | 162                  | 47.6 | 86                      | 25.3 | 340         | 547   | 164    | 43      | 3 (2)        | 464       | -              | a                  |
| Dentist                                                                                                                                                                     | 3                 | 0.9 | 85                | 26.1 | 127                  | 39.0 | 111                     | 34.0 | 326         | 380   | 12     | 42      | 3 (2)        | 494       | -              | a                  |
| Veterinarian                                                                                                                                                                | 2                 | 0.8 | 92                | 36.2 | 111                  | 43.7 | 49                      | 19.3 | 254         | 403   | 110    | 39      | 3 (1)        | 413       | -              | b                  |
| Myself                                                                                                                                                                      |                   |     |                   |      |                      |      |                         |      |             |       |        |         |              |           |                |                    |

| Survey question: How much of a problem do you think antibiotic resistance is to the HEALTH of the following in Australia, and people in developing and developed countries?                                                                                                                        |                   |      |                   |      |                      |      |                         |      |             |       |        |         |              |           |                |                    |
|----------------------------------------------------------------------------------------------------------------------------------------------------------------------------------------------------------------------------------------------------------------------------------------------------|-------------------|------|-------------------|------|----------------------|------|-------------------------|------|-------------|-------|--------|---------|--------------|-----------|----------------|--------------------|
|                                                                                                                                                                                                                                                                                                    | Responses         |      |                   |      |                      |      |                         |      |             |       |        |         |              |           |                |                    |
|                                                                                                                                                                                                                                                                                                    | Not a problem (1) |      | Minor problem (2) |      | Moderate problem (3) |      | Significant problem (4) |      | Valid Total | Total | Unsure | Missing | Median (IQR) | Mean rank | P <sup>¶</sup> | Group <sup>§</sup> |
|                                                                                                                                                                                                                                                                                                    | n                 | %    | n                 | %    | n                    | %    | n                       | %    |             |       |        |         |              |           |                |                    |
| Total                                                                                                                                                                                                                                                                                              | 158               | 13.4 | 410               | 34.7 | 355                  | 30.1 | 257                     | 21.8 | 1180        | 1330  | 24     | 126     | 3 (1)        | -         | <0.001         | -                  |
| Doctor                                                                                                                                                                                                                                                                                             | 74                | 15.0 | 158               | 32.1 | 158                  | 32.1 | 102                     | 20.7 | 492         | 547   | 11     | 44      | 3 (1)        | 586       | -              | a                  |
| Dentist                                                                                                                                                                                                                                                                                            | 38                | 11.5 | 96                | 29.1 | 94                   | 28.5 | 102                     | 30.9 | 330         | 380   | 7      | 43      | 3 (2)        | 653       | -              | b                  |
| Veterinarian                                                                                                                                                                                                                                                                                       | 46                | 12.8 | 156               | 43.6 | 103                  | 28.8 | 53                      | 14.8 | 358         | 403   | 6      | 39      | 2 (1)        | 539       | -              | a                  |
| Patients in veterinary clinics                                                                                                                                                                                                                                                                     |                   |      |                   |      |                      |      |                         |      |             |       |        |         |              |           |                |                    |
| Total                                                                                                                                                                                                                                                                                              | 32                | 3.9  | 282               | 34.7 | 322                  | 39.6 | 177                     | 21.8 | 813         | 1330  | 389    | 128     | 3 (1)        | -         | <0.001         | -                  |
| Doctor                                                                                                                                                                                                                                                                                             | 11                | 4.4  | 73                | 29.3 | 102                  | 41.0 | 63                      | 25.3 | 249         | 547   | 253    | 45      | 3 (2)        | 430       | -              | a                  |
| Dentist                                                                                                                                                                                                                                                                                            | 8                 | 3.9  | 40                | 19.3 | 85                   | 41.1 | 74                      | 35.7 | 207         | 380   | 130    | 43      | 3 (1)        | 489       | -              | b                  |
| Veterinarian                                                                                                                                                                                                                                                                                       | 13                | 3.6  | 169               | 47.3 | 135                  | 37.8 | 40                      | 11.2 | 357         | 403   | 6      | 40      | 2 (1)        | 344       | -              | c                  |
| Horses                                                                                                                                                                                                                                                                                             |                   |      |                   |      |                      |      |                         |      |             |       |        |         |              |           |                |                    |
| Total                                                                                                                                                                                                                                                                                              | 42                | 6.2  | 274               | 40.5 | 226                  | 33.4 | 135                     | 19.9 | 677         | 1330  | 525    | 128     | 3 (1)        | -         | <0.001         | -                  |
| Doctor                                                                                                                                                                                                                                                                                             | 12                | 5.7  | 77                | 36.7 | 77                   | 36.7 | 44                      | 21.0 | 210         | 547   | 293    | 44      | 3 (1)        | 352       | -              | a                  |
| Dentist                                                                                                                                                                                                                                                                                            | 9                 | 5.3  | 44                | 26.0 | 62                   | 36.7 | 54                      | 32.0 | 169         | 380   | 167    | 44      | 3 (2)        | 400       | -              | b                  |
| Veterinarian                                                                                                                                                                                                                                                                                       | 21                | 7.0  | 153               | 51.3 | 87                   | 29.2 | 37                      | 12.4 | 298         | 403   | 65     | 40      | 2 (1)        | 295       | -              | c                  |
| Dogs and cats                                                                                                                                                                                                                                                                                      |                   |      |                   |      |                      |      |                         |      |             |       |        |         |              |           |                |                    |
| Total                                                                                                                                                                                                                                                                                              | 42                | 5.7  | 302               | 41.1 | 268                  | 36.5 | 123                     | 16.7 | 735         | 1330  | 467    | 128     | 3 (1)        | -         | <0.001         | -                  |
| Doctor                                                                                                                                                                                                                                                                                             | 16                | 7.5  | 80                | 37.6 | 77                   | 36.2 | 40                      | 18.8 | 213         | 547   | 289    | 45      | 3 (1)        | 374       | -              | a                  |
| Dentist                                                                                                                                                                                                                                                                                            | 9                 | 5.3  | 44                | 26.0 | 66                   | 39.1 | 50                      | 29.6 | 169         | 380   | 168    | 43      | 3 (2)        | 438       | -              | b                  |
| Veterinarian                                                                                                                                                                                                                                                                                       | 17                | 4.8  | 178               | 50.4 | 125                  | 35.4 | 33                      | 9.3  | 353         | 403   | 10     | 40      | 2 (1)        | 331       | -              | c                  |
| People in developing countries                                                                                                                                                                                                                                                                     |                   |      |                   |      |                      |      |                         |      |             |       |        |         |              |           |                |                    |
| Total                                                                                                                                                                                                                                                                                              | 16                | 1.4  | 158               | 14.2 | 271                  | 24.4 | 666                     | 59.9 | 1111        | 1330  | 91     | 128     | 4 (1)        | -         | <0.001         | -                  |
| Doctor                                                                                                                                                                                                                                                                                             | 4                 | 0.8  | 38                | 8.0  | 107                  | 22.6 | 325                     | 68.6 | 474         | 547   | 29     | 44      | 4 (1)        | 611       | -              | a                  |
| Dentist                                                                                                                                                                                                                                                                                            | 4                 | 1.3  | 53                | 16.8 | 69                   | 21.9 | 189                     | 60.0 | 315         | 380   | 21     | 44      | 4 (1)        | 551       | -              | b                  |
| Veterinarian                                                                                                                                                                                                                                                                                       | 8                 | 2.5  | 67                | 20.8 | 95                   | 29.5 | 152                     | 47.2 | 322         | 403   | 41     | 40      | 3 (1)        | 479       | -              | c                  |
| People in developed countries                                                                                                                                                                                                                                                                      |                   |      |                   |      |                      |      |                         |      |             |       |        |         |              |           |                |                    |
| Total                                                                                                                                                                                                                                                                                              | 3                 | 0.3  | 82                | 7.0  | 417                  | 35.7 | 666                     | 57.0 | 1168        | 1330  | 35     | 127     | 4 (1)        | -         | 0.002          | -                  |
| Doctor                                                                                                                                                                                                                                                                                             | 2                 | 0.4  | 30                | 6.0  | 173                  | 34.9 | 291                     | 58.7 | 496         | 547   | 8      | 43      | 4 (1)        | 595       | -              | a                  |
| Dentist                                                                                                                                                                                                                                                                                            | 1                 | 0.3  | 13                | 4.0  | 113                  | 34.5 | 201                     | 61.3 | 328         | 380   | 8      | 44      | 4 (1)        | 615       | -              | a                  |
| Veterinarian                                                                                                                                                                                                                                                                                       | 0                 | 0.0  | 39                | 11.3 | 131                  | 38.1 | 174                     | 50.6 | 344         | 403   | 19     | 40      | 4 (1)        | 540       | -              | b                  |
| ¶ Kruskal-Wallis test P-value                                                                                                                                                                                                                                                                      |                   |      |                   |      |                      |      |                         |      |             |       |        |         |              |           |                |                    |
| § Groups with letters in common are not significantly different (P-value of pairwise comparison >0.05); Groups with different letters are significantly different (P-value of comparison >0.05); Groups with different letters are significantly different (P-value of pairwise comparison <0.05). |                   |      |                   |      |                      |      |                         |      |             |       |        |         |              |           |                |                    |

**Supplementary Table 6. Perceived relative importance of the roles of stakeholders in managing/preventing the issue of antibiotic resistance and Kruskal-Wallis test results (Figure 2c data).**

| Survey question: In your opinion, how important are the roles of each of the following in managing/preventing the issue of antibiotic resistance? |                   |     |                        |      |                          |      |                    |      |                         |      |             |       |         |              |           |                |                    |
|---------------------------------------------------------------------------------------------------------------------------------------------------|-------------------|-----|------------------------|------|--------------------------|------|--------------------|------|-------------------------|------|-------------|-------|---------|--------------|-----------|----------------|--------------------|
|                                                                                                                                                   | Responses         |     |                        |      |                          |      |                    |      |                         |      | Valid Total | Total | Missing | Median (IQR) | Mean rank | P <sup>¶</sup> | Group <sup>§</sup> |
|                                                                                                                                                   | Not important (1) |     | Somewhat important (2) |      | Moderately important (3) |      | Very important (4) |      | Extremely important (5) |      |             |       |         |              |           |                |                    |
|                                                                                                                                                   | n                 | %   | n                      | %    | n                        | %    | n                  | %    | n                       | %    |             |       |         |              |           |                |                    |
| Hospital doctors                                                                                                                                  |                   |     |                        |      |                          |      |                    |      |                         |      |             |       |         |              |           |                |                    |
| Total                                                                                                                                             | 1                 | 0.1 | 19                     | 1.6  | 116                      | 9.7  | 493                | 41.3 | 565                     | 47.3 | 1194        | 1330  | 136     | 4 (1)        | -         | <0.001         | -                  |
| Doctor                                                                                                                                            | 1                 | 0.2 | 9                      | 1.8  | 66                       | 13.2 | 216                | 43.3 | 207                     | 41.5 | 499         | 547   | 48      | 4 (1)        | 555       | -              | a                  |
| Dentist                                                                                                                                           | 0                 | 0.0 | 5                      | 1.5  | 17                       | 5.1  | 125                | 37.2 | 189                     | 56.3 | 336         | 380   | 44      | 5 (1)        | 660       | -              | b                  |
| Veterinarian                                                                                                                                      | 0                 | 0.0 | 5                      | 1.4  | 33                       | 9.2  | 152                | 42.3 | 169                     | 47.1 | 359         | 403   | 44      | 4 (1)        | 599       | -              | a                  |
| General medical practitioners (GPs)                                                                                                               |                   |     |                        |      |                          |      |                    |      |                         |      |             |       |         |              |           |                |                    |
| Total                                                                                                                                             | 1                 | 0.1 | 36                     | 3.0  | 143                      | 12.0 | 494                | 41.4 | 518                     | 43.5 | 1192        | 1330  | 138     | 4 (1)        | -         | <0.001         | -                  |
| Doctor                                                                                                                                            | 1                 | 0.2 | 20                     | 4.0  | 82                       | 16.5 | 199                | 40.0 | 196                     | 39.4 | 498         | 547   | 49      | 4 (1)        | 557       | -              | a                  |
| Dentist                                                                                                                                           | 0                 | 0.0 | 5                      | 1.5  | 20                       | 6.0  | 133                | 39.7 | 177                     | 52.8 | 335         | 380   | 45      | 5 (1)        | 670       | -              | b                  |
| Veterinarian                                                                                                                                      | 0                 | 0.0 | 11                     | 3.1  | 41                       | 11.4 | 162                | 45.1 | 145                     | 40.4 | 359         | 403   | 44      | 4 (1)        | 583       | -              | a                  |
| Global organisations (e.g. WHO, OIE)                                                                                                              |                   |     |                        |      |                          |      |                    |      |                         |      |             |       |         |              |           |                |                    |
| Total                                                                                                                                             | 15                | 1.3 | 60                     | 5.0  | 155                      | 13.0 | 462                | 38.8 | 498                     | 41.8 | 1190        | 1330  | 140     | 4 (1)        | -         | <0.001         | -                  |
| Doctor                                                                                                                                            | 7                 | 1.4 | 28                     | 5.7  | 76                       | 15.4 | 192                | 38.8 | 192                     | 38.8 | 495         | 547   | 52      | 4 (1)        | 570       | -              | a                  |
| Dentist                                                                                                                                           | 3                 | 0.9 | 15                     | 4.5  | 24                       | 7.2  | 128                | 38.2 | 165                     | 49.3 | 335         | 380   | 45      | 4 (1)        | 653       | -              | b                  |
| Veterinarian                                                                                                                                      | 5                 | 1.4 | 17                     | 4.7  | 55                       | 15.3 | 142                | 39.4 | 141                     | 39.2 | 360         | 403   | 43      | 4 (1)        | 576       | -              | a                  |
| Governments                                                                                                                                       |                   |     |                        |      |                          |      |                    |      |                         |      |             |       |         |              |           |                |                    |
| Total                                                                                                                                             | 19                | 1.6 | 84                     | 7.1  | 190                      | 16.0 | 446                | 37.5 | 450                     | 37.8 | 1189        | 1330  | 141     | 4 (1)        | -         | <0.001         | -                  |
| Doctor                                                                                                                                            | 10                | 2.0 | 36                     | 7.2  | 87                       | 17.5 | 183                | 36.8 | 181                     | 36.4 | 497         | 547   | 50      | 4 (2)        | 581       | -              | a                  |
| Dentist                                                                                                                                           | 5                 | 1.5 | 17                     | 5.1  | 35                       | 10.5 | 117                | 35.1 | 159                     | 47.7 | 333         | 380   | 47      | 4 (1)        | 666       | -              | b                  |
| Veterinarian                                                                                                                                      | 4                 | 1.1 | 31                     | 8.6  | 68                       | 18.9 | 146                | 40.7 | 110                     | 30.6 | 359         | 403   | 44      | 4 (2)        | 549       | -              | a                  |
| Pharmaceutical companies                                                                                                                          |                   |     |                        |      |                          |      |                    |      |                         |      |             |       |         |              |           |                |                    |
| Total                                                                                                                                             | 39                | 3.3 | 103                    | 8.7  | 197                      | 16.6 | 403                | 33.9 | 446                     | 37.5 | 1188        | 1330  | 142     | 4 (2)        | -         | <0.001         | -                  |
| Doctor                                                                                                                                            | 28                | 5.6 | 59                     | 11.9 | 89                       | 17.9 | 169                | 34.1 | 151                     | 30.4 | 496         | 547   | 51      | 4 (2)        | 533       | -              | a                  |
| Dentist                                                                                                                                           | 7                 | 2.1 | 17                     | 5.1  | 44                       | 13.2 | 98                 | 29.4 | 167                     | 50.2 | 333         | 380   | 47      | 5 (1)        | 680       | -              | b                  |
| Veterinarian                                                                                                                                      | 4                 | 1.1 | 27                     | 7.5  | 64                       | 17.8 | 136                | 37.9 | 128                     | 35.7 | 359         | 403   | 44      | 4 (2)        | 599       | -              | c                  |
| The Media                                                                                                                                         |                   |     |                        |      |                          |      |                    |      |                         |      |             |       |         |              |           |                |                    |
| Total                                                                                                                                             | 46                | 3.9 | 110                    | 9.2  | 219                      | 18.4 | 409                | 34.4 | 406                     | 34.1 | 1190        | 1330  | 140     | 4 (2)        | -         | <0.001         | -                  |
| Doctor                                                                                                                                            | 19                | 3.8 | 43                     | 8.6  | 92                       | 18.5 | 171                | 34.3 | 173                     | 34.7 | 498         | 547   | 49      | 4 (2)        | 601       | -              | a                  |
| Dentist                                                                                                                                           | 10                | 3.0 | 26                     | 7.8  | 47                       | 14.1 | 107                | 32.1 | 143                     | 42.9 | 333         | 380   | 47      | 4 (1)        | 657       | -              | a                  |
| Veterinarian                                                                                                                                      | 17                | 4.7 | 41                     | 11.4 | 80                       | 22.3 | 131                | 36.5 | 90                      | 25.1 | 359         | 403   | 44      | 4 (2)        | 531       | -              | b                  |
| Scientists                                                                                                                                        |                   |     |                        |      |                          |      |                    |      |                         |      |             |       |         |              |           |                |                    |

| Survey question: In your opinion, how important are the roles of each of the following in managing/preventing the issue of antibiotic resistance? |                   |     |                        |      |                          |      |                    |      |                         |      |             |       |         |              |           |                |                    |
|---------------------------------------------------------------------------------------------------------------------------------------------------|-------------------|-----|------------------------|------|--------------------------|------|--------------------|------|-------------------------|------|-------------|-------|---------|--------------|-----------|----------------|--------------------|
|                                                                                                                                                   | Responses         |     |                        |      |                          |      |                    |      |                         |      |             |       |         |              |           |                |                    |
|                                                                                                                                                   | Not important (1) |     | Somewhat important (2) |      | Moderately important (3) |      | Very important (4) |      | Extremely important (5) |      | Valid Total | Total | Missing | Median (IQR) | Mean rank | P <sup>¶</sup> | Group <sup>§</sup> |
|                                                                                                                                                   | n                 | %   | n                      | %    | n                        | %    | n                  | %    | n                       | %    |             |       |         |              |           |                |                    |
| Total                                                                                                                                             | 20                | 1.7 | 146                    | 12.3 | 228                      | 19.2 | 433                | 36.4 | 362                     | 30.4 | 1189        | 1330  | 141     | 4 (2)        | -         | <0.001         | -                  |
| Doctor                                                                                                                                            | 10                | 2.0 | 72                     | 14.5 | 101                      | 20.4 | 183                | 36.9 | 130                     | 26.2 | 496         | 547   | 51      | 4 (2)        | 561       | -              | a                  |
| Dentist                                                                                                                                           | 6                 | 1.8 | 26                     | 7.8  | 55                       | 16.4 | 109                | 32.5 | 139                     | 41.5 | 335         | 380   | 45      | 4 (2)        | 671       | -              | b                  |
| Veterinarian                                                                                                                                      | 4                 | 1.1 | 48                     | 13.4 | 72                       | 20.1 | 141                | 39.4 | 93                      | 26.0 | 358         | 403   | 45      | 4 (2)        | 572       | -              | a                  |
| Myself                                                                                                                                            |                   |     |                        |      |                          |      |                    |      |                         |      |             |       |         |              |           |                |                    |
| Total                                                                                                                                             | 9                 | 0.8 | 128                    | 10.7 | 246                      | 20.6 | 474                | 39.7 | 338                     | 28.3 | 1195        | 1330  | 135     | 4 (2)        | -         | <0.001         | -                  |
| Doctor                                                                                                                                            | 2                 | 0.4 | 40                     | 8.0  | 108                      | 21.6 | 187                | 37.5 | 162                     | 32.5 | 499         | 547   | 48      | 4 (2)        | 628       | -              | a                  |
| Dentist                                                                                                                                           | 3                 | 0.9 | 32                     | 9.5  | 52                       | 15.5 | 149                | 44.3 | 100                     | 29.8 | 336         | 380   | 44      | 4 (2)        | 628       | -              | a                  |
| Veterinarian                                                                                                                                      | 4                 | 1.1 | 56                     | 15.6 | 86                       | 23.9 | 138                | 38.3 | 76                      | 21.1 | 360         | 403   | 43      | 4 (1)        | 528       | -              | b                  |
| Pharmacists                                                                                                                                       |                   |     |                        |      |                          |      |                    |      |                         |      |             |       |         |              |           |                |                    |
| Total                                                                                                                                             | 36                | 3.0 | 141                    | 11.8 | 281                      | 23.6 | 400                | 33.5 | 335                     | 28.1 | 1193        | 1330  | 137     | 4 (2)        | -         | <0.001         | -                  |
| Doctor                                                                                                                                            | 21                | 4.2 | 69                     | 13.9 | 140                      | 28.1 | 155                | 31.1 | 113                     | 22.7 | 498         | 547   | 49      | 4 (1)        | 543       | -              | a                  |
| Dentist                                                                                                                                           | 8                 | 2.4 | 22                     | 6.6  | 48                       | 14.3 | 116                | 34.6 | 141                     | 42.1 | 335         | 380   | 45      | 4 (1)        | 713       | -              | b                  |
| Veterinarian                                                                                                                                      | 7                 | 1.9 | 50                     | 13.9 | 93                       | 25.8 | 129                | 35.8 | 81                      | 22.5 | 360         | 403   | 43      | 4 (1)        | 564       | -              | a                  |
| My immediate colleagues/peers                                                                                                                     |                   |     |                        |      |                          |      |                    |      |                         |      |             |       |         |              |           |                |                    |
| Total                                                                                                                                             | 7                 | 0.6 | 124                    | 10.4 | 255                      | 21.3 | 483                | 40.4 | 327                     | 27.3 | 1196        | 1330  | 134     | 4 (2)        | -         | <0.001         | -                  |
| Doctor                                                                                                                                            | 3                 | 0.6 | 36                     | 7.2  | 112                      | 22.4 | 197                | 39.4 | 152                     | 30.4 | 500         | 547   | 47      | 4 (2)        | 625       | -              | a                  |
| Dentist                                                                                                                                           | 2                 | 0.6 | 33                     | 9.8  | 54                       | 16.1 | 147                | 43.8 | 100                     | 29.8 | 336         | 380   | 44      | 4 (2)        | 631       | -              | a                  |
| Veterinarian                                                                                                                                      | 2                 | 0.6 | 55                     | 15.3 | 89                       | 24.7 | 139                | 38.6 | 75                      | 20.8 | 360         | 403   | 43      | 4 (1)        | 532       | -              | b                  |
| Farmers and food producers                                                                                                                        |                   |     |                        |      |                          |      |                    |      |                         |      |             |       |         |              |           |                |                    |
| Total                                                                                                                                             | 13                | 1.1 | 126                    | 10.6 | 251                      | 21.2 | 474                | 40.0 | 322                     | 27.2 | 1186        | 1330  | 144     | 4 (2)        | -         | 0.177          | -                  |
| Doctor                                                                                                                                            | 7                 | 1.4 | 58                     | 11.7 | 100                      | 20.2 | 187                | 37.8 | 143                     | 28.9 | 495         | 547   | 52      | 4 (2)        | 596       | -              | -                  |
| Dentist                                                                                                                                           | 6                 | 1.8 | 36                     | 10.8 | 59                       | 17.8 | 128                | 38.6 | 103                     | 31.0 | 332         | 380   | 48      | 4 (2)        | 616       | -              | -                  |
| Veterinarian                                                                                                                                      | 0                 | 0.0 | 32                     | 8.9  | 92                       | 25.6 | 159                | 44.3 | 76                      | 21.2 | 359         | 403   | 44      | 4 (1)        | 570       | -              | -                  |
| Veterinarians                                                                                                                                     |                   |     |                        |      |                          |      |                    |      |                         |      |             |       |         |              |           |                |                    |
| Total                                                                                                                                             | 15                | 1.3 | 131                    | 11.0 | 238                      | 20.1 | 497                | 41.9 | 306                     | 25.8 | 1187        | 1330  | 143     | 4 (2)        | -         | <0.001         | -                  |
| Doctor                                                                                                                                            | 7                 | 1.4 | 65                     | 13.2 | 112                      | 22.7 | 201                | 40.7 | 109                     | 22.1 | 494         | 547   | 53      | 4 (1)        | 557       | -              | a                  |
| Dentist                                                                                                                                           | 7                 | 2.1 | 39                     | 11.7 | 65                       | 19.5 | 133                | 39.9 | 89                      | 26.7 | 333         | 380   | 47      | 4 (2)        | 591       | -              | a,b                |
| Veterinarian                                                                                                                                      | 1                 | 0.3 | 27                     | 7.5  | 61                       | 16.9 | 163                | 45.3 | 108                     | 30.0 | 360         | 403   | 43      | 4 (1)        | 648       | -              | b                  |
| Dentists                                                                                                                                          |                   |     |                        |      |                          |      |                    |      |                         |      |             |       |         |              |           |                |                    |
| Total                                                                                                                                             | 11                | 0.9 | 140                    | 11.8 | 305                      | 25.6 | 441                | 37.1 | 293                     | 24.6 | 1190        | 1330  | 140     | 4 (1)        | -         | <0.001         | -                  |
| Doctor                                                                                                                                            | 7                 | 1.4 | 77                     | 15.5 | 152                      | 30.6 | 155                | 31.3 | 105                     | 21.2 | 496         | 547   | 51      | 4 (1)        | 538       | -              | a                  |
| Dentist                                                                                                                                           | 2                 | 0.6 | 27                     | 8.1  | 62                       | 18.5 | 138                | 41.2 | 106                     | 31.6 | 335         | 380   | 45      | 4 (2)        | 672       | -              | b                  |
| Veterinarian                                                                                                                                      | 2                 | 0.6 | 36                     | 10.0 | 91                       | 25.3 | 148                | 41.2 | 82                      | 22.8 | 359         | 403   | 44      | 4 (1)        | 603       | -              | c                  |



| Survey question: In your opinion, how important are the roles of each of the following in managing/preventing the issue of antibiotic resistance?                                                                                                                                                  |                   |     |                        |      |                          |      |                    |      |                         |      |             |       |         |              |                |                    |   |
|----------------------------------------------------------------------------------------------------------------------------------------------------------------------------------------------------------------------------------------------------------------------------------------------------|-------------------|-----|------------------------|------|--------------------------|------|--------------------|------|-------------------------|------|-------------|-------|---------|--------------|----------------|--------------------|---|
|                                                                                                                                                                                                                                                                                                    | Responses         |     |                        |      |                          |      |                    |      |                         |      |             |       |         |              | P <sup>¶</sup> | Group <sup>§</sup> |   |
|                                                                                                                                                                                                                                                                                                    | Not important (1) |     | Somewhat important (2) |      | Moderately important (3) |      | Very important (4) |      | Extremely important (5) |      | Valid Total | Total | Missing | Median (IQR) | Mean rank      |                    |   |
|                                                                                                                                                                                                                                                                                                    | n                 | %   | n                      | %    | n                        | %    | n                  | %    | n                       | %    |             |       |         |              |                |                    |   |
| Nurses                                                                                                                                                                                                                                                                                             |                   |     |                        |      |                          |      |                    |      |                         |      |             |       |         |              |                |                    |   |
| Total                                                                                                                                                                                                                                                                                              | 41                | 3.4 | 195                    | 16.3 | 280                      | 23.5 | 398                | 33.4 | 279                     | 23.4 | 1193        | 1330  | 137     | 4 (1)        | -              | <0.001             | - |
| Doctor                                                                                                                                                                                                                                                                                             | 29                | 5.8 | 105                    | 21.1 | 131                      | 26.4 | 149                | 30.0 | 83                      | 16.7 | 497         | 547   | 50      | 3 (2)        | 520            | -                  | a |
| Dentist                                                                                                                                                                                                                                                                                            | 7                 | 2.1 | 35                     | 10.4 | 58                       | 17.3 | 120                | 35.7 | 116                     | 34.5 | 336         | 380   | 44      | 4 (2)        | 699            | -                  | b |
| Veterinarian                                                                                                                                                                                                                                                                                       | 5                 | 1.4 | 55                     | 15.3 | 91                       | 25.3 | 129                | 35.8 | 80                      | 22.2 | 360         | 403   | 43      | 4 (1)        | 607            | -                  | c |
| The general public                                                                                                                                                                                                                                                                                 |                   |     |                        |      |                          |      |                    |      |                         |      |             |       |         |              |                |                    |   |
| Total                                                                                                                                                                                                                                                                                              | 22                | 1.8 | 153                    | 12.8 | 306                      | 25.6 | 465                | 39.0 | 247                     | 20.7 | 1193        | 1330  | 137     | 4 (1)        | -              | <0.001             | - |
| Doctor                                                                                                                                                                                                                                                                                             | 11                | 2.2 | 54                     | 10.8 | 117                      | 23.4 | 199                | 39.9 | 118                     | 23.6 | 499         | 547   | 48      | 4 (1)        | 626            | -                  | a |
| Dentist                                                                                                                                                                                                                                                                                            | 1                 | 0.3 | 31                     | 9.2  | 85                       | 25.3 | 129                | 38.4 | 90                      | 26.8 | 336         | 380   | 44      | 4 (2)        | 653            | -                  | a |
| Veterinarian                                                                                                                                                                                                                                                                                       | 10                | 2.8 | 68                     | 19.0 | 104                      | 29.1 | 137                | 38.3 | 39                      | 10.9 | 358         | 403   | 45      | 3 (1)        | 504            | -                  | b |
| My clients/patients                                                                                                                                                                                                                                                                                |                   |     |                        |      |                          |      |                    |      |                         |      |             |       |         |              |                |                    |   |
| Total                                                                                                                                                                                                                                                                                              | 22                | 1.8 | 193                    | 16.2 | 334                      | 28.0 | 424                | 35.6 | 219                     | 18.4 | 1192        | 1330  | 138     | 4 (1)        | -              | <0.001             | - |
| Doctor                                                                                                                                                                                                                                                                                             | 10                | 2.0 | 66                     | 13.2 | 135                      | 27.1 | 185                | 37.1 | 103                     | 20.6 | 499         | 547   | 48      | 4 (1)        | 625            | -                  | a |
| Dentist                                                                                                                                                                                                                                                                                            | 1                 | 0.3 | 42                     | 12.5 | 83                       | 24.8 | 131                | 39.1 | 78                      | 23.3 | 335         | 380   | 45      | 4 (1)        | 660            | -                  | a |
| Veterinarian                                                                                                                                                                                                                                                                                       | 11                | 3.1 | 85                     | 23.7 | 116                      | 32.4 | 108                | 30.2 | 38                      | 10.6 | 358         | 403   | 45      | 3 (2)        | 497            | -                  | b |
| Pet owners                                                                                                                                                                                                                                                                                         |                   |     |                        |      |                          |      |                    |      |                         |      |             |       |         |              |                |                    |   |
| Total                                                                                                                                                                                                                                                                                              | 69                | 5.8 | 323                    | 27.3 | 359                      | 30.3 | 290                | 24.5 | 142                     | 12.0 | 1183        | 1330  | 147     | 3 (2)        | -              | 0.339              | - |
| Doctor                                                                                                                                                                                                                                                                                             | 32                | 6.5 | 141                    | 28.7 | 149                      | 30.3 | 110                | 22.4 | 60                      | 12.2 | 492         | 547   | 55      | 3 (2)        | 578            | -                  | - |
| Dentist                                                                                                                                                                                                                                                                                            | 23                | 6.9 | 85                     | 25.6 | 92                       | 27.7 | 77                 | 23.2 | 55                      | 16.6 | 332         | 380   | 48      | 3 (2)        | 612            | -                  | - |
| Veterinarian                                                                                                                                                                                                                                                                                       | 14                | 3.9 | 97                     | 27.0 | 118                      | 32.9 | 103                | 28.7 | 27                      | 7.5  | 359         | 403   | 44      | 3 (2)        | 593            | -                  | - |
| ¶ Kruskal-Wallis test P-value                                                                                                                                                                                                                                                                      |                   |     |                        |      |                          |      |                    |      |                         |      |             |       |         |              |                |                    |   |
| § Groups with letters in common are not significantly different (P-value of pairwise comparison >0.05); Groups with different letters are significantly different (P-value of comparison >0.05); Groups with different letters are significantly different (P-value of pairwise comparison <0.05). |                   |     |                        |      |                          |      |                    |      |                         |      |             |       |         |              |                |                    |   |

**Supplementary Figure 4. Stacked bar charts of responses about factors influencing prescribing decisions, barriers to appropriate prescribing, and helpfulness of measures (corresponds with Figure 3).**

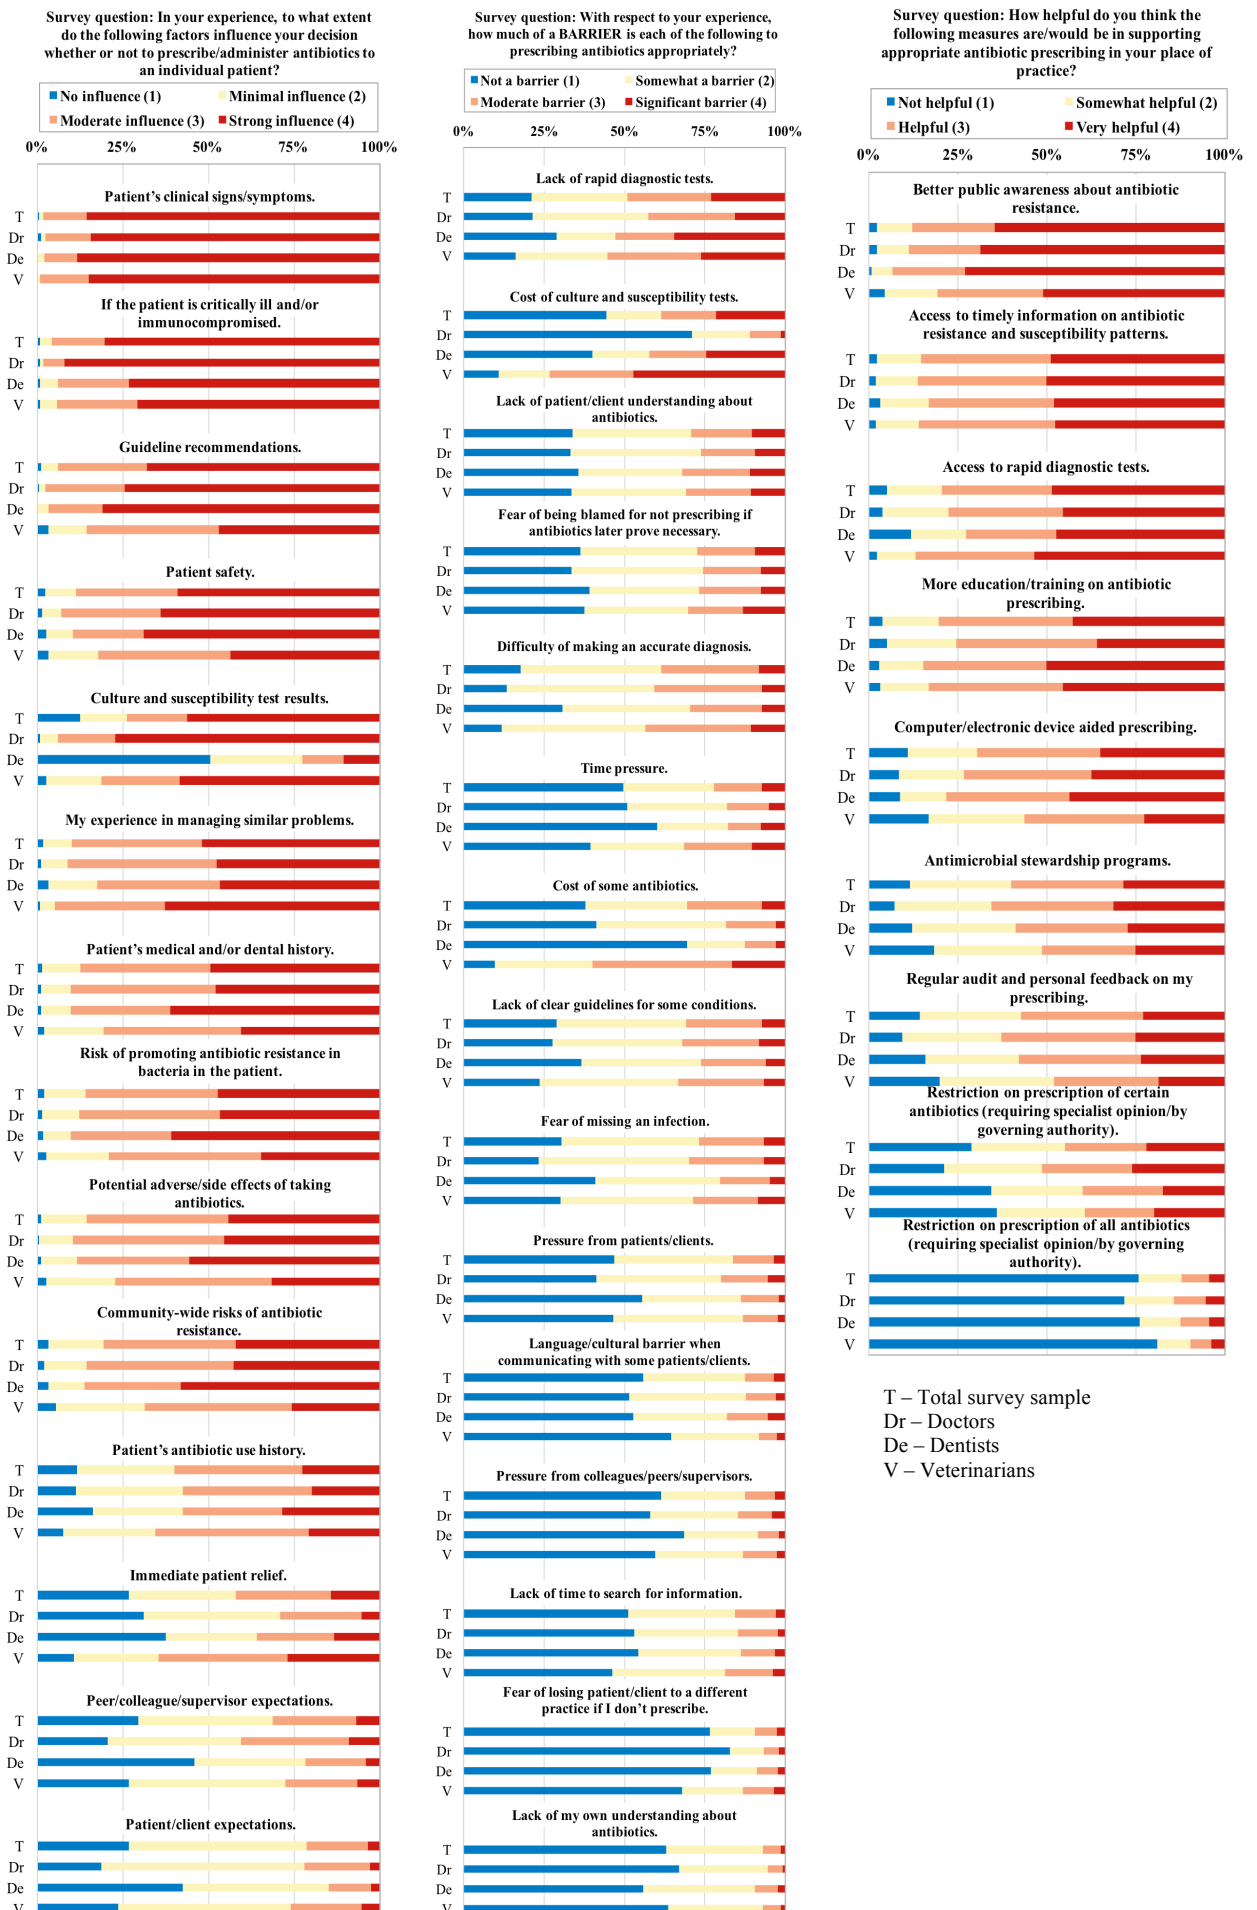

**Supplementary Table 7. Relative extent to which the listed factors influence decisions whether or not to prescribe antibiotics and Kruskal-Wallis test results (Figure 3a data).**

| Survey question: In your experience, to what extent do the following factors influence your decision WHETHER or NOT TO prescribe/administer antibiotics to an individual patient? |                  |      |                       |      |                        |      |                      |      |             |       |     |         |              |           |                |                    |
|-----------------------------------------------------------------------------------------------------------------------------------------------------------------------------------|------------------|------|-----------------------|------|------------------------|------|----------------------|------|-------------|-------|-----|---------|--------------|-----------|----------------|--------------------|
|                                                                                                                                                                                   | Responses        |      |                       |      |                        |      |                      |      |             |       |     |         |              |           |                |                    |
|                                                                                                                                                                                   | No influence (1) |      | Minimal influence (2) |      | Moderate influence (3) |      | Strong influence (4) |      | Valid Total | Total | N/A | Missing | Median (IQR) | Mean rank | P <sup>¶</sup> | Group <sup>§</sup> |
|                                                                                                                                                                                   | n                | %    | n                     | %    | n                      | %    | n                    | %    |             |       |     |         |              |           |                |                    |
| Patient's clinical signs/symptoms.                                                                                                                                                |                  |      |                       |      |                        |      |                      |      |             |       |     |         |              |           |                |                    |
| Total                                                                                                                                                                             | 7                | 0.5  | 17                    | 1.3  | 164                    | 12.6 | 1118                 | 85.6 | 1306        | 1330  | 2   | 22      | 4 (0)        | -         | 0.221          | -                  |
| Doctor                                                                                                                                                                            | 6                | 1.1  | 7                     | 1.3  | 72                     | 13.4 | 453                  | 84.2 | 538         | 547   | 0   | 9       | 4 (0)        | 644       | -              | -                  |
| Dentist                                                                                                                                                                           | 1                | 0.3  | 7                     | 1.9  | 36                     | 9.6  | 331                  | 88.3 | 375         | 380   | 1   | 4       | 4 (0)        | 670       | -              | -                  |
| Veterinarian                                                                                                                                                                      | 0                | 0.0  | 3                     | 0.8  | 56                     | 14.2 | 334                  | 85.0 | 393         | 403   | 1   | 9       | 4 (0)        | 651       | -              | -                  |
| If the patient is critically ill and/or immunocompromised.                                                                                                                        |                  |      |                       |      |                        |      |                      |      |             |       |     |         |              |           |                |                    |
| Total                                                                                                                                                                             | 11               | 0.9  | 43                    | 3.4  | 198                    | 15.5 | 1023                 | 80.2 | 1275        | 1330  | 28  | 27      | 4 (0)        | -         | <0.001         | -                  |
| Doctor                                                                                                                                                                            | 4                | 0.8  | 6                     | 1.1  | 33                     | 6.2  | 489                  | 91.9 | 532         | 547   | 6   | 9       | 4 (0)        | 712       | -              | a                  |
| Dentist                                                                                                                                                                           | 3                | 0.8  | 19                    | 5.3  | 75                     | 20.8 | 264                  | 73.1 | 361         | 380   | 11  | 8       | 4 (1)        | 592       | -              | b                  |
| Veterinarian                                                                                                                                                                      | 4                | 1.0  | 18                    | 4.7  | 90                     | 23.6 | 270                  | 70.7 | 382         | 403   | 11  | 10      | 4 (1)        | 578       | -              | b                  |
| Guideline recommendations.                                                                                                                                                        |                  |      |                       |      |                        |      |                      |      |             |       |     |         |              |           |                |                    |
| Total                                                                                                                                                                             | 17               | 1.3  | 64                    | 5.0  | 331                    | 25.7 | 878                  | 68.1 | 1290        | 1330  | 12  | 28      | 4 (1)        | -         | <0.001         | -                  |
| Doctor                                                                                                                                                                            | 3                | 0.6  | 10                    | 1.9  | 124                    | 23.2 | 398                  | 74.4 | 535         | 547   | 3   | 9       | 4 (1)        | 692       | -              | a                  |
| Dentist                                                                                                                                                                           | 1                | 0.3  | 11                    | 3.0  | 59                     | 15.9 | 300                  | 80.9 | 371         | 380   | 1   | 8       | 4 (0)        | 729       | -              | a                  |
| Veterinarian                                                                                                                                                                      | 13               | 3.4  | 43                    | 11.2 | 148                    | 38.5 | 180                  | 46.9 | 384         | 403   | 8   | 11      | 3 (1)        | 500       | -              | b                  |
| Patient safety.                                                                                                                                                                   |                  |      |                       |      |                        |      |                      |      |             |       |     |         |              |           |                |                    |
| Total                                                                                                                                                                             | 31               | 2.5  | 113                   | 9.0  | 374                    | 29.6 | 744                  | 59.0 | 1262        | 1330  | 27  | 41      | 4 (1)        | -         | <0.001         | -                  |
| Doctor                                                                                                                                                                            | 8                | 1.5  | 30                    | 5.7  | 153                    | 29.0 | 336                  | 63.8 | 527         | 547   | 7   | 13      | 4 (1)        | 669       | -              | a                  |
| Dentist                                                                                                                                                                           | 10               | 2.8  | 27                    | 7.7  | 73                     | 20.8 | 241                  | 68.7 | 351         | 380   | 11  | 18      | 4 (1)        | 688       | -              | a                  |
| Veterinarian                                                                                                                                                                      | 13               | 3.4  | 56                    | 14.6 | 148                    | 38.5 | 167                  | 43.5 | 384         | 403   | 9   | 10      | 3 (1)        | 528       | -              | b                  |
| Culture and susceptibility test results.                                                                                                                                          |                  |      |                       |      |                        |      |                      |      |             |       |     |         |              |           |                |                    |
| Total                                                                                                                                                                             | 148              | 12.5 | 162                   | 13.7 | 207                    | 17.5 | 665                  | 56.3 | 1182        | 1330  | 113 | 35      | 4 (2)        | -         | <0.001         | -                  |
| Doctor                                                                                                                                                                            | 5                | 0.9  | 28                    | 5.3  | 88                     | 16.5 | 412                  | 77.3 | 533         | 547   | 3   | 11      | 4 (0)        | 738       | -              | a                  |
| Dentist                                                                                                                                                                           | 133              | 50.6 | 71                    | 27.0 | 31                     | 11.8 | 28                   | 10.6 | 263         | 380   | 102 | 15      | 1 (1)        | 239       | -              | b                  |
| Veterinarian                                                                                                                                                                      | 10               | 2.6  | 63                    | 16.3 | 88                     | 22.8 | 225                  | 58.3 | 386         | 403   | 8   | 9       | 4 (1)        | 629       | -              | c                  |
| My experience in managing similar problems.                                                                                                                                       |                  |      |                       |      |                        |      |                      |      |             |       |     |         |              |           |                |                    |
| Total                                                                                                                                                                             | 22               | 1.7  | 109                   | 8.5  | 490                    | 38.0 | 668                  | 51.8 | 1289        | 1330  | 9   | 32      | 4 (1)        | -         | <0.001         | -                  |
| Doctor                                                                                                                                                                            | 7                | 1.3  | 40                    | 7.5  | 234                    | 43.7 | 255                  | 47.6 | 536         | 547   | 1   | 10      | 3 (1)        | 625       | -              | a                  |
| Dentist                                                                                                                                                                           | 12               | 3.3  | 52                    | 14.3 | 130                    | 35.8 | 169                  | 46.6 | 363         | 380   | 5   | 12      | 3 (1)        | 591       | -              | a                  |
| Veterinarian                                                                                                                                                                      | 3                | 0.8  | 17                    | 4.4  | 126                    | 32.3 | 244                  | 62.6 | 390         | 403   | 3   | 10      | 4 (1)        | 723       | -              | b                  |
| Patient's medical and/or dental history.                                                                                                                                          |                  |      |                       |      |                        |      |                      |      |             |       |     |         |              |           |                |                    |

| Survey question: In your experience, to what extent do the following factors influence your decision WHETHER or NOT TO prescribe/administer antibiotics to an individual patient? |                  |      |                       |      |                        |      |                      |      |             |       |     |         |              |           |                |                    |
|-----------------------------------------------------------------------------------------------------------------------------------------------------------------------------------|------------------|------|-----------------------|------|------------------------|------|----------------------|------|-------------|-------|-----|---------|--------------|-----------|----------------|--------------------|
|                                                                                                                                                                                   | Responses        |      |                       |      |                        |      |                      |      |             |       |     |         |              |           |                |                    |
|                                                                                                                                                                                   | No influence (1) |      | Minimal influence (2) |      | Moderate influence (3) |      | Strong influence (4) |      | Valid Total | Total | N/A | Missing | Median (IQR) | Mean rank | P <sup>¶</sup> | Group <sup>§</sup> |
|                                                                                                                                                                                   | n                | %    | n                     | %    | n                      | %    | n                    | %    |             |       |     |         |              |           |                |                    |
| Total                                                                                                                                                                             | 19               | 1.5  | 145                   | 11.2 | 490                    | 37.9 | 640                  | 49.5 | 1294        | 1330  | 9   | 27      | 3 (1)        | -         | <0.001         | -                  |
| Doctor                                                                                                                                                                            | 7                | 1.3  | 46                    | 8.6  | 227                    | 42.2 | 258                  | 48.0 | 538         | 547   | 0   | 9       | 3 (1)        | 648       | -              | a                  |
| Dentist                                                                                                                                                                           | 4                | 1.1  | 32                    | 8.6  | 108                    | 29.2 | 226                  | 61.1 | 370         | 380   | 1   | 9       | 4 (1)        | 723       | -              | b                  |
| Veterinarian                                                                                                                                                                      | 8                | 2.1  | 67                    | 17.4 | 155                    | 40.2 | 156                  | 40.4 | 386         | 403   | 8   | 9       | 3 (1)        | 574       | -              | c                  |
| Risk of promoting antibiotic resistance in bacteria in the patient.                                                                                                               |                  |      |                       |      |                        |      |                      |      |             |       |     |         |              |           |                |                    |
| Total                                                                                                                                                                             | 26               | 2.0  | 158                   | 12.2 | 500                    | 38.7 | 608                  | 47.1 | 1292        | 1330  | 6   | 32      | 3 (1)        | -         | <0.001         | -                  |
| Doctor                                                                                                                                                                            | 8                | 1.5  | 58                    | 10.8 | 219                    | 40.9 | 250                  | 46.7 | 535         | 547   | 1   | 11      | 3 (1)        | 651       | -              | a                  |
| Dentist                                                                                                                                                                           | 7                | 1.9  | 29                    | 7.9  | 107                    | 29.2 | 223                  | 60.9 | 366         | 380   | 1   | 13      | 4 (1)        | 738       | -              | b                  |
| Veterinarian                                                                                                                                                                      | 11               | 2.8  | 71                    | 18.2 | 174                    | 44.5 | 135                  | 34.5 | 391         | 403   | 4   | 8       | 3 (1)        | 554       | -              | c                  |
| Potential adverse/side effects of taking antibiotics.                                                                                                                             |                  |      |                       |      |                        |      |                      |      |             |       |     |         |              |           |                |                    |
| Total                                                                                                                                                                             | 17               | 1.3  | 171                   | 13.2 | 535                    | 41.4 | 570                  | 44.1 | 1293        | 1330  | 6   | 31      | 3 (1)        | -         | <0.001         | -                  |
| Doctor                                                                                                                                                                            | 3                | 0.6  | 53                    | 9.9  | 237                    | 44.2 | 243                  | 45.3 | 536         | 547   | 1   | 10      | 3 (1)        | 669       | -              | a                  |
| Dentist                                                                                                                                                                           | 4                | 1.1  | 39                    | 10.6 | 120                    | 32.7 | 204                  | 55.6 | 367         | 380   | 1   | 12      | 4 (1)        | 721       | -              | a                  |
| Veterinarian                                                                                                                                                                      | 10               | 2.6  | 79                    | 20.3 | 178                    | 45.6 | 123                  | 31.5 | 390         | 403   | 4   | 9       | 3 (1)        | 547       | -              | b                  |
| Community-wide risks of antibiotic resistance.                                                                                                                                    |                  |      |                       |      |                        |      |                      |      |             |       |     |         |              |           |                |                    |
| Total                                                                                                                                                                             | 44               | 3.4  | 207                   | 16.0 | 498                    | 38.6 | 541                  | 41.9 | 1290        | 1330  | 7   | 33      | 3 (1)        | -         | <0.001         | -                  |
| Doctor                                                                                                                                                                            | 11               | 2.1  | 67                    | 12.5 | 229                    | 42.7 | 229                  | 42.7 | 536         | 547   | 1   | 10      | 3 (1)        | 669       | -              | a                  |
| Dentist                                                                                                                                                                           | 12               | 3.3  | 39                    | 10.6 | 103                    | 28.1 | 213                  | 58.0 | 367         | 380   | 1   | 12      | 4 (1)        | 749       | -              | b                  |
| Veterinarian                                                                                                                                                                      | 21               | 5.4  | 101                   | 26.1 | 166                    | 42.9 | 99                   | 25.6 | 387         | 403   | 5   | 11      | 3 (2)        | 515       | -              | c                  |
| Patient’s antibiotic use history.                                                                                                                                                 |                  |      |                       |      |                        |      |                      |      |             |       |     |         |              |           |                |                    |
| Total                                                                                                                                                                             | 150              | 11.7 | 364                   | 28.4 | 479                    | 37.4 | 289                  | 22.5 | 1282        | 1330  | 17  | 31      | 3 (1)        | -         | 0.124          | -                  |
| Doctor                                                                                                                                                                            | 61               | 11.4 | 166                   | 31.1 | 201                    | 37.7 | 105                  | 19.7 | 533         | 547   | 4   | 10      | 3 (1)        | 621       | -              | -                  |
| Dentist                                                                                                                                                                           | 59               | 16.2 | 96                    | 26.3 | 106                    | 29.0 | 104                  | 28.5 | 365         | 380   | 3   | 12      | 3 (2)        | 643       | -              | -                  |
| Veterinarian                                                                                                                                                                      | 30               | 7.8  | 102                   | 26.6 | 172                    | 44.8 | 80                   | 20.8 | 384         | 403   | 10  | 9       | 3 (1)        | 669       | -              | -                  |
| Immediate patient relief.                                                                                                                                                         |                  |      |                       |      |                        |      |                      |      |             |       |     |         |              |           |                |                    |
| Total                                                                                                                                                                             | 337              | 26.7 | 395                   | 31.3 | 348                    | 27.6 | 180                  | 14.3 | 1260        | 1330  | 30  | 40      | 2 (2)        | -         | <0.001         | -                  |
| Doctor                                                                                                                                                                            | 161              | 31.2 | 205                   | 39.7 | 122                    | 23.6 | 28                   | 5.4  | 516         | 547   | 18  | 13      | 2 (2)        | 543       | -              | a                  |
| Dentist                                                                                                                                                                           | 134              | 37.5 | 95                    | 26.6 | 80                     | 22.4 | 48                   | 13.4 | 357         | 380   | 5   | 18      | 2 (2)        | 566       | -              | a                  |
| Veterinarian                                                                                                                                                                      | 42               | 10.9 | 95                    | 24.5 | 146                    | 37.7 | 104                  | 26.9 | 387         | 403   | 7   | 9       | 3 (2)        | 806       | -              | b                  |
| Peer/colleague/supervisor expectations.                                                                                                                                           |                  |      |                       |      |                        |      |                      |      |             |       |     |         |              |           |                |                    |
| Total                                                                                                                                                                             | 372              | 29.6 | 493                   | 39.2 | 306                    | 24.3 | 87                   | 6.9  | 1258        | 1330  | 35  | 37      | 2 (2)        | -         | <0.001         | -                  |
| Doctor                                                                                                                                                                            | 109              | 20.7 | 205                   | 38.9 | 165                    | 31.3 | 48                   | 9.1  | 527         | 547   | 10  | 10      | 2 (1)        | 709       | -              | a                  |

| Survey question: In your experience, to what extent do the following factors influence your decision WHETHER or NOT TO prescribe/administer antibiotics to an individual patient?                                                                                                                 |                  |      |                       |      |                        |      |                      |     |             |       |     |         |              |           |                |                    |
|---------------------------------------------------------------------------------------------------------------------------------------------------------------------------------------------------------------------------------------------------------------------------------------------------|------------------|------|-----------------------|------|------------------------|------|----------------------|-----|-------------|-------|-----|---------|--------------|-----------|----------------|--------------------|
|                                                                                                                                                                                                                                                                                                   | Responses        |      |                       |      |                        |      |                      |     |             |       |     |         |              |           |                |                    |
|                                                                                                                                                                                                                                                                                                   | No influence (1) |      | Minimal influence (2) |      | Moderate influence (3) |      | Strong influence (4) |     | Valid Total | Total | N/A | Missing | Median (IQR) | Mean rank | P <sup>¶</sup> | Group <sup>§</sup> |
|                                                                                                                                                                                                                                                                                                   | n                | %    | n                     | %    | n                      | %    | n                    | %   |             |       |     |         |              |           |                |                    |
| Dentist                                                                                                                                                                                                                                                                                           | 159              | 46.1 | 112                   | 32.5 | 60                     | 17.4 | 14                   | 4.1 | 345         | 380   | 18  | 17      | 2 (1)        | 513       | -              | b                  |
| Veterinarian                                                                                                                                                                                                                                                                                      | 104              | 26.9 | 176                   | 45.6 | 81                     | 21.0 | 25                   | 6.5 | 386         | 403   | 7   | 10      | 2 (2)        | 625       | -              | c                  |
| Patient/client expectations.                                                                                                                                                                                                                                                                      |                  |      |                       |      |                        |      |                      |     |             |       |     |         |              |           |                |                    |
| Total                                                                                                                                                                                                                                                                                             | 342              | 26.9 | 662                   | 52.0 | 225                    | 17.7 | 44                   | 3.5 | 1273        | 1330  | 20  | 37      | 2 (1)        | -         | <0.001         | -                  |
| Doctor                                                                                                                                                                                                                                                                                            | 100              | 18.7 | 317                   | 59.4 | 102                    | 19.1 | 15                   | 2.8 | 534         | 547   | 2   | 11      | 2 (0)        | 680       | -              | a                  |
| Dentist                                                                                                                                                                                                                                                                                           | 151              | 42.5 | 151                   | 42.5 | 44                     | 12.4 | 9                    | 2.5 | 355         | 380   | 8   | 17      | 2 (1)        | 530       | -              | b                  |
| Veterinarian                                                                                                                                                                                                                                                                                      | 91               | 23.7 | 194                   | 50.5 | 79                     | 20.6 | 20                   | 5.2 | 384         | 403   | 10  | 9       | 2 (1)        | 676       | -              | a                  |
| ¶Kruskal-Wallis test P-value                                                                                                                                                                                                                                                                      |                  |      |                       |      |                        |      |                      |     |             |       |     |         |              |           |                |                    |
| §Groups with letters in common are not significantly different (P-value of pairwise comparison >0.05); Groups with different letters are significantly different (P-value of comparison >0.05); Groups with different letters are significantly different (P-value of pairwise comparison <0.05). |                  |      |                       |      |                        |      |                      |     |             |       |     |         |              |           |                |                    |

**Supplementary Table 8. Relative extent to which respondents perceived the listed factors as barriers to prescribing antibiotics appropriately and Kruskal-Wallis test results (Figure 3b data).**

Results (Figure 3b data).

| Survey question: With respect to YOUR experience, how much of a BARRIER is each of the following to prescribing antibiotics appropriately? |                   |      |                        |      |                      |      |                         |      |             |       |     |         |              |           |                |                    |  |
|--------------------------------------------------------------------------------------------------------------------------------------------|-------------------|------|------------------------|------|----------------------|------|-------------------------|------|-------------|-------|-----|---------|--------------|-----------|----------------|--------------------|--|
|                                                                                                                                            | Responses         |      |                        |      |                      |      |                         |      |             |       |     |         |              |           |                |                    |  |
|                                                                                                                                            | Not a barrier (1) |      | Somewhat a barrier (2) |      | Moderate barrier (3) |      | Significant barrier (4) |      | Valid Total | Total | N/A | Missing | Median (IQR) | Mean rank | P <sup>¶</sup> | Group <sup>§</sup> |  |
|                                                                                                                                            | n                 | %    | n                      | %    | n                    | %    | n                       | %    |             |       |     |         |              |           |                |                    |  |
| Lack of rapid diagnostic tests.                                                                                                            |                   |      |                        |      |                      |      |                         |      |             |       |     |         |              |           |                |                    |  |
| Total                                                                                                                                      | 240               | 21.2 | 337                    | 29.8 | 292                  | 25.8 | 261                     | 23.1 | 1130        | 1330  | 135 | 65      | 2 (1)        | -         | <0.001         | -                  |  |
| Doctor                                                                                                                                     | 111               | 21.4 | 187                    | 36.0 | 140                  | 27.0 | 81                      | 15.6 | 519         | 547   | 8   | 20      | 2 (1)        | 524       | -              | a                  |  |
| Dentist                                                                                                                                    | 69                | 29.0 | 43                     | 18.1 | 44                   | 18.5 | 82                      | 34.5 | 238         | 380   | 116 | 26      | 3 (3)        | 587       | -              | b                  |  |
| Veterinarian                                                                                                                               | 60                | 16.1 | 107                    | 28.7 | 108                  | 29.0 | 98                      | 26.3 | 373         | 403   | 11  | 19      | 3 (2)        | 609       | -              | b                  |  |
| Cost of culture and susceptibility tests.                                                                                                  |                   |      |                        |      |                      |      |                         |      |             |       |     |         |              |           |                |                    |  |
| Total                                                                                                                                      | 468               | 44.3 | 181                    | 17.1 | 179                  | 17.0 | 228                     | 21.6 | 1056        | 1330  | 210 | 64      | 2 (2)        | -         | <0.001         | -                  |  |
| Doctor                                                                                                                                     | 357               | 71.0 | 90                     | 17.9 | 49                   | 9.7  | 7                       | 1.4  | 503         | 547   | 25  | 19      | 1 (1)        | 352       | -              | a                  |  |
| Dentist                                                                                                                                    | 70                | 40.0 | 31                     | 17.7 | 31                   | 17.7 | 43                      | 24.6 | 175         | 380   | 178 | 27      | 2 (2)        | 555       | -              | b                  |  |
| Veterinarian                                                                                                                               | 41                | 10.8 | 60                     | 15.9 | 99                   | 26.2 | 178                     | 47.1 | 378         | 403   | 7   | 18      | 3 (2)        | 752       | -              | c                  |  |
| Lack of patient/client understanding about antibiotics.                                                                                    |                   |      |                        |      |                      |      |                         |      |             |       |     |         |              |           |                |                    |  |
| Total                                                                                                                                      | 418               | 33.9 | 455                    | 36.9 | 233                  | 18.9 | 126                     | 10.2 | 1232        | 1330  | 32  | 66      | 2 (2)        | -         | 0.730          | -                  |  |
| Doctor                                                                                                                                     | 172               | 33.2 | 211                    | 40.7 | 86                   | 16.6 | 49                      | 9.5  | 518         | 547   | 10  | 19      | 2 (2)        | 608       | -              | -                  |  |
| Dentist                                                                                                                                    | 122               | 35.6 | 111                    | 32.4 | 72                   | 21.0 | 38                      | 11.1 | 343         | 380   | 11  | 26      | 2 (2)        | 621       | -              | -                  |  |
| Veterinarian                                                                                                                               | 124               | 33.4 | 133                    | 35.8 | 75                   | 20.2 | 39                      | 10.5 | 371         | 403   | 11  | 21      | 2 (2)        | 625       | -              | -                  |  |

| Survey question: With respect to YOUR experience, how much of a BARRIER is each of the following to prescribing antibiotics appropriately? |                   |      |                        |      |                      |      |                         |      |             |       |     |         |              |           |                |                    |  |
|--------------------------------------------------------------------------------------------------------------------------------------------|-------------------|------|------------------------|------|----------------------|------|-------------------------|------|-------------|-------|-----|---------|--------------|-----------|----------------|--------------------|--|
|                                                                                                                                            | Responses         |      |                        |      |                      |      |                         |      |             |       |     |         |              |           |                |                    |  |
|                                                                                                                                            | Not a barrier (1) |      | Somewhat a barrier (2) |      | Moderate barrier (3) |      | Significant barrier (4) |      | Valid Total | Total | N/A | Missing | Median (IQR) | Mean rank | P <sup>†</sup> | Group <sup>§</sup> |  |
|                                                                                                                                            | n                 | %    | n                      | %    | n                    | %    | n                       | %    |             |       |     |         |              |           |                |                    |  |
| Fear of being blamed for not prescribing if antibiotics later prove necessary.                                                             |                   |      |                        |      |                      |      |                         |      |             |       |     |         |              |           |                |                    |  |
| Total                                                                                                                                      | 449               | 36.3 | 451                    | 36.4 | 222                  | 17.9 | 116                     | 9.4  | 1238        | 1330  | 26  | 66      | 2 (2)        | -         | 0.543          | -                  |  |
| Doctor                                                                                                                                     | 175               | 33.6 | 213                    | 40.9 | 93                   | 17.9 | 40                      | 7.7  | 521         | 547   | 6   | 20      | 2 (2)        | 623       | -              | -                  |  |
| Dentist                                                                                                                                    | 132               | 39.1 | 115                    | 34.0 | 65                   | 19.2 | 26                      | 7.7  | 338         | 380   | 16  | 26      | 2 (2)        | 603       | -              | -                  |  |
| Veterinarian                                                                                                                               | 142               | 37.5 | 123                    | 32.5 | 64                   | 16.9 | 50                      | 13.2 | 379         | 403   | 4   | 20      | 2 (2)        | 630       | -              | -                  |  |
| Difficulty of making an accurate diagnosis.                                                                                                |                   |      |                        |      |                      |      |                         |      |             |       |     |         |              |           |                |                    |  |
| Total                                                                                                                                      | 215               | 17.6 | 536                    | 43.8 | 371                  | 30.3 | 102                     | 8.3  | 1224        | 1330  | 40  | 66      | 2 (1)        | -         | <0.001         | -                  |  |
| Doctor                                                                                                                                     | 70                | 13.5 | 238                    | 45.8 | 174                  | 33.5 | 38                      | 7.3  | 520         | 547   | 7   | 20      | 2 (1)        | 635       | -              | a                  |  |
| Dentist                                                                                                                                    | 100               | 30.6 | 130                    | 39.8 | 73                   | 22.3 | 24                      | 7.3  | 327         | 380   | 27  | 26      | 2 (2)        | 521       | -              | b                  |  |
| Veterinarian                                                                                                                               | 45                | 11.9 | 168                    | 44.6 | 124                  | 32.9 | 40                      | 10.6 | 377         | 403   | 6   | 20      | 2 (1)        | 661       | -              | a                  |  |
| Time pressure.                                                                                                                             |                   |      |                        |      |                      |      |                         |      |             |       |     |         |              |           |                |                    |  |
| Total                                                                                                                                      | 591               | 49.7 | 334                    | 28.1 | 177                  | 14.9 | 87                      | 7.3  | 1189        | 1330  | 76  | 65      | 2 (1)        | -         | <0.001         | -                  |  |
| Doctor                                                                                                                                     | 260               | 50.9 | 159                    | 31.1 | 66                   | 12.9 | 26                      | 5.1  | 511         | 547   | 17  | 19      | 1 (1)        | 576       | -              | a                  |  |
| Dentist                                                                                                                                    | 183               | 60.2 | 67                     | 22.0 | 31                   | 10.2 | 23                      | 7.6  | 304         | 380   | 48  | 28      | 1 (1)        | 535       | -              | a                  |  |
| Veterinarian                                                                                                                               | 148               | 39.6 | 108                    | 28.9 | 80                   | 21.4 | 38                      | 10.2 | 374         | 403   | 11  | 18      | 2 (2)        | 670       | -              | b                  |  |
| Cost of some antibiotics.                                                                                                                  |                   |      |                        |      |                      |      |                         |      |             |       |     |         |              |           |                |                    |  |
| Total                                                                                                                                      | 445               | 38.0 | 371                    | 31.7 | 270                  | 23.1 | 85                      | 7.3  | 1171        | 1330  | 93  | 66      | 2 (2)        | -         | <0.001         | -                  |  |
| Doctor                                                                                                                                     | 207               | 41.2 | 204                    | 40.6 | 77                   | 15.3 | 15                      | 3.0  | 503         | 547   | 23  | 21      | 2 (1)        | 527       | -              | a                  |  |
| Dentist                                                                                                                                    | 201               | 69.6 | 52                     | 18.0 | 28                   | 9.7  | 8                       | 2.8  | 289         | 380   | 64  | 27      | 1 (1)        | 392       | -              | b                  |  |
| Veterinarian                                                                                                                               | 37                | 9.8  | 115                    | 30.3 | 165                  | 43.5 | 62                      | 16.4 | 379         | 403   | 6   | 18      | 3 (1)        | 812       | -              | c                  |  |
| Lack of clear guidelines for some conditions.                                                                                              |                   |      |                        |      |                      |      |                         |      |             |       |     |         |              |           |                |                    |  |
| Total                                                                                                                                      | 347               | 28.8 | 486                    | 40.3 | 287                  | 23.8 | 85                      | 7.1  | 1205        | 1330  | 61  | 64      | 2 (2)        | -         | 0.003          | -                  |  |
| Doctor                                                                                                                                     | 144               | 27.7 | 209                    | 40.3 | 124                  | 23.9 | 42                      | 8.1  | 519         | 547   | 9   | 19      | 2 (2)        | 614       | -              | a                  |  |
| Dentist                                                                                                                                    | 116               | 36.6 | 118                    | 37.2 | 64                   | 20.2 | 19                      | 6.0  | 317         | 380   | 36  | 27      | 2 (2)        | 550       | -              | b                  |  |
| Veterinarian                                                                                                                               | 87                | 23.6 | 159                    | 43.1 | 99                   | 26.8 | 24                      | 6.5  | 369         | 403   | 16  | 18      | 2 (1)        | 633       | -              | a                  |  |
|                                                                                                                                            |                   |      |                        |      |                      |      |                         |      |             |       |     |         |              |           |                |                    |  |
| Fear of missing an infection.                                                                                                              |                   |      |                        |      |                      |      |                         |      |             |       |     |         |              |           |                |                    |  |
| Total                                                                                                                                      | 373               | 30.3 | 528                    | 42.9 | 248                  | 20.1 | 83                      | 6.7  | 1232        | 1330  | 31  | 67      | 2 (2)        | -         | <0.001         | -                  |  |
| Doctor                                                                                                                                     | 121               | 23.3 | 243                    | 46.8 | 120                  | 23.1 | 35                      | 6.7  | 519         | 547   | 7   | 21      | 2 (1)        | 660       | -              | a                  |  |
| Dentist                                                                                                                                    | 138               | 41.1 | 130                    | 38.7 | 52                   | 15.5 | 16                      | 4.8  | 336         | 380   | 17  | 27      | 2 (1)        | 539       | -              | b                  |  |
| Veterinarian                                                                                                                               | 114               | 30.2 | 155                    | 41.1 | 76                   | 20.2 | 32                      | 8.5  | 377         | 403   | 7   | 19      | 2 (2)        | 626       | -              | a                  |  |
| Pressure from patients/clients.                                                                                                            |                   |      |                        |      |                      |      |                         |      |             |       |     |         |              |           |                |                    |  |
| Total                                                                                                                                      | 575               | 46.8 | 455                    | 37.0 | 155                  | 12.6 | 44                      | 3.6  | 1229        | 1330  | 36  | 65      | 2 (1)        | -         | <0.001         | -                  |  |
| Doctor                                                                                                                                     | 214               | 41.2 | 201                    | 38.7 | 76                   | 14.6 | 28                      | 5.4  | 519         | 547   | 7   | 21      | 2 (1)        | 657       | -              | a                  |  |

| Survey question: With respect to YOUR experience, how much of a BARRIER is each of the following to prescribing antibiotics appropriately?                                                                                                                                                         |                   |      |                        |      |                      |      |                         |     |             |       |     |         |              |           |                |                    |  |
|----------------------------------------------------------------------------------------------------------------------------------------------------------------------------------------------------------------------------------------------------------------------------------------------------|-------------------|------|------------------------|------|----------------------|------|-------------------------|-----|-------------|-------|-----|---------|--------------|-----------|----------------|--------------------|--|
|                                                                                                                                                                                                                                                                                                    | Responses         |      |                        |      |                      |      |                         |     |             |       |     |         |              |           |                |                    |  |
|                                                                                                                                                                                                                                                                                                    | Not a barrier (1) |      | Somewhat a barrier (2) |      | Moderate barrier (3) |      | Significant barrier (4) |     | Valid Total | Total | N/A | Missing | Median (IQR) | Mean rank | P <sup>¶</sup> | Group <sup>§</sup> |  |
|                                                                                                                                                                                                                                                                                                    | n                 | %    | n                      | %    | n                    | %    | n                       | %   |             |       |     |         |              |           |                |                    |  |
| Dentist                                                                                                                                                                                                                                                                                            | 188               | 55.6 | 104                    | 30.8 | 39                   | 11.5 | 7                       | 2.1 | 338         | 380   | 17  | 25      | 1 (1)        | 560       | -              | b                  |  |
| Veterinarian                                                                                                                                                                                                                                                                                       | 173               | 46.5 | 150                    | 40.3 | 40                   | 10.8 | 9                       | 2.4 | 372         | 403   | 12  | 19      | 2 (1)        | 606       | -              | a,b                |  |
| Language/cultural barrier when communicating with some patients/clients.                                                                                                                                                                                                                           |                   |      |                        |      |                      |      |                         |     |             |       |     |         |              |           |                |                    |  |
| Total                                                                                                                                                                                                                                                                                              | 667               | 55.8 | 379                    | 31.7 | 109                  | 9.1  | 41                      | 3.4 | 1196        | 1330  | 69  | 65      | 1 (1)        | -         | <0.001         | -                  |  |
| Doctor                                                                                                                                                                                                                                                                                             | 261               | 51.6 | 184                    | 36.4 | 47                   | 9.3  | 14                      | 2.8 | 506         | 547   | 22  | 19      | 1 (1)        | 619       | -              | a                  |  |
| Dentist                                                                                                                                                                                                                                                                                            | 174               | 52.7 | 96                     | 29.1 | 42                   | 12.7 | 18                      | 5.5 | 330         | 380   | 24  | 26      | 1 (1)        | 630       | -              | a                  |  |
| Veterinarian                                                                                                                                                                                                                                                                                       | 232               | 64.4 | 99                     | 27.5 | 20                   | 5.6  | 9                       | 2.5 | 360         | 403   | 23  | 20      | 1 (1)        | 541       | -              | b                  |  |
| Pressure from colleagues/peers/supervisors.                                                                                                                                                                                                                                                        |                   |      |                        |      |                      |      |                         |     |             |       |     |         |              |           |                |                    |  |
| Total                                                                                                                                                                                                                                                                                              | 745               | 61.4 | 317                    | 26.1 | 114                  | 9.4  | 38                      | 3.1 | 1214        | 1330  | 50  | 66      | 1 (1)        | -         | 0.003          | -                  |  |
| Doctor                                                                                                                                                                                                                                                                                             | 297               | 57.9 | 140                    | 27.3 | 55                   | 10.7 | 21                      | 4.1 | 513         | 547   | 15  | 19      | 1 (1)        | 632       | -              | a                  |  |
| Dentist                                                                                                                                                                                                                                                                                            | 227               | 68.6 | 76                     | 23.0 | 21                   | 6.3  | 7                       | 2.1 | 331         | 380   | 22  | 27      | 1 (1)        | 560       | -              | b                  |  |
| Veterinarian                                                                                                                                                                                                                                                                                       | 221               | 59.7 | 101                    | 27.3 | 38                   | 10.3 | 10                      | 2.7 | 370         | 403   | 13  | 20      | 1 (1)        | 617       | -              | a                  |  |
| Lack of time to search for information.                                                                                                                                                                                                                                                            |                   |      |                        |      |                      |      |                         |     |             |       |     |         |              |           |                |                    |  |
| Total                                                                                                                                                                                                                                                                                              | 620               | 51.2 | 403                    | 33.3 | 153                  | 12.6 | 36                      | 3.0 | 1212        | 1330  | 50  | 68      | 1 (1)        | -         | 0.034          | -                  |  |
| Doctor                                                                                                                                                                                                                                                                                             | 269               | 53.0 | 165                    | 32.5 | 63                   | 12.4 | 11                      | 2.2 | 508         | 547   | 18  | 21      | 1 (1)        | 594       | -              | a                  |  |
| Dentist                                                                                                                                                                                                                                                                                            | 175               | 54.2 | 104                    | 32.2 | 34                   | 10.5 | 10                      | 3.1 | 323         | 380   | 29  | 28      | 1 (1)        | 586       | -              | a                  |  |
| Veterinarian                                                                                                                                                                                                                                                                                       | 176               | 46.2 | 134                    | 35.2 | 56                   | 14.7 | 15                      | 3.9 | 381         | 403   | 3   | 19      | 2 (1)        | 641       | -              | a                  |  |
| Fear of losing patient/client to a different practice if I don't prescribe.                                                                                                                                                                                                                        |                   |      |                        |      |                      |      |                         |     |             |       |     |         |              |           |                |                    |  |
| Total                                                                                                                                                                                                                                                                                              | 895               | 76.6 | 165                    | 14.1 | 79                   | 6.8  | 29                      | 2.5 | 1168        | 1330  | 96  | 66      | 1 (0)        | -         | <0.001         | -                  |  |
| Doctor                                                                                                                                                                                                                                                                                             | 400               | 83.0 | 50                     | 10.4 | 23                   | 4.8  | 9                       | 1.9 | 482         | 547   | 46  | 19      | 1 (0)        | 547       | -              | a                  |  |
| Dentist                                                                                                                                                                                                                                                                                            | 247               | 76.9 | 46                     | 14.3 | 21                   | 6.5  | 7                       | 2.2 | 321         | 380   | 31  | 28      | 1 (0)        | 582       | -              | a                  |  |
| Veterinarian                                                                                                                                                                                                                                                                                       | 248               | 67.9 | 69                     | 18.9 | 35                   | 9.6  | 13                      | 3.6 | 365         | 403   | 19  | 19      | 1 (1)        | 636       | -              | b                  |  |
| Lack of my own understanding about antibiotics.                                                                                                                                                                                                                                                    |                   |      |                        |      |                      |      |                         |     |             |       |     |         |              |           |                |                    |  |
| Total                                                                                                                                                                                                                                                                                              | 760               | 62.9 | 363                    | 30.0 | 69                   | 5.7  | 16                      | 1.3 | 1208        | 1330  | 55  | 67      | 1 (1)        | -         | 0.003          | -                  |  |
| Doctor                                                                                                                                                                                                                                                                                             | 340               | 67.1 | 139                    | 27.4 | 25                   | 4.9  | 3                       | 0.6 | 507         | 547   | 20  | 20      | 1 (1)        | 578       | -              | a                  |  |
| Dentist                                                                                                                                                                                                                                                                                            | 183               | 55.8 | 114                    | 34.8 | 23                   | 7.0  | 8                       | 2.4 | 328         | 380   | 26  | 26      | 1 (1)        | 650       | -              | b                  |  |
| Veterinarian                                                                                                                                                                                                                                                                                       | 237               | 63.5 | 110                    | 29.5 | 21                   | 5.6  | 5                       | 1.3 | 373         | 403   | 9   | 21      | 1 (1)        | 601       | -              | a,b                |  |
|                                                                                                                                                                                                                                                                                                    |                   |      |                        |      |                      |      |                         |     |             |       |     |         |              |           |                |                    |  |
| ¶ Kruskal-Wallis test P-value                                                                                                                                                                                                                                                                      |                   |      |                        |      |                      |      |                         |     |             |       |     |         |              |           |                |                    |  |
| § Groups with letters in common are not significantly different (P-value of pairwise comparison >0.05); Groups with different letters are significantly different (P-value of comparison >0.05); Groups with different letters are significantly different (P-value of pairwise comparison <0.05). |                   |      |                        |      |                      |      |                         |     |             |       |     |         |              |           |                |                    |  |

**Supplementary Table 9. Relative extent to which the listed measures were perceived as helpful to supporting appropriate prescribing and Kruskal-Wallis test results (Figure 3c data).**

| Survey question: How helpful do you think the following measures are/would be in supporting appropriate antibiotic prescribing in YOUR place of practice? |                 |      |                      |      |             |      |                  |      |             |       |        |         |         |              |           |                |                    |
|-----------------------------------------------------------------------------------------------------------------------------------------------------------|-----------------|------|----------------------|------|-------------|------|------------------|------|-------------|-------|--------|---------|---------|--------------|-----------|----------------|--------------------|
|                                                                                                                                                           | Responses       |      |                      |      |             |      |                  |      |             |       |        |         |         | Median (IQR) | Mean rank | P <sup>¶</sup> | Group <sup>§</sup> |
|                                                                                                                                                           | Not helpful (1) |      | Somewhat helpful (2) |      | Helpful (3) |      | Very helpful (4) |      | Valid Total | Total | Unsure | Missing |         |              |           |                |                    |
|                                                                                                                                                           | n               | %    | n                    | %    | n           | %    | n                | %    |             |       |        |         |         |              |           |                |                    |
| Better public awareness about antibiotic resistance.                                                                                                      |                 |      |                      |      |             |      |                  |      |             |       |        |         |         |              |           |                |                    |
| Total                                                                                                                                                     | 30              | 2.4  | 122                  | 9.9  | 282         | 23.0 | 794              | 64.7 | 1228        | 1330  | 6      | 96      | 4 (1)   | -            | <0.001    | -              |                    |
| Doctor                                                                                                                                                    | 12              | 2.3  | 45                   | 8.8  | 103         | 20.2 | 351              | 68.7 | 511         | 547   | 5      | 31      | 4 (1)   | 639          | -         | a              |                    |
| Dentist                                                                                                                                                   | 2               | 0.6  | 21                   | 6.1  | 70          | 20.2 | 253              | 73.1 | 346         | 380   | 0      | 34      | 4 (1)   | 673          | -         | a              |                    |
| Veterinarian                                                                                                                                              | 16              | 4.3  | 56                   | 15.1 | 109         | 29.4 | 190              | 51.2 | 371         | 403   | 1      | 31      | 4 (1)   | 527          | -         | b              |                    |
| Access to timely information on antibiotic resistance and susceptibility patterns.                                                                        |                 |      |                      |      |             |      |                  |      |             |       |        |         |         |              |           |                |                    |
| Total                                                                                                                                                     | 28              | 2.3  | 150                  | 12.3 | 446         | 36.6 | 594              | 48.8 | 1218        | 1330  | 11     | 101     | 3 (1)   | -            | 0.599     | -              |                    |
| Doctor                                                                                                                                                    | 10              | 1.9  | 60                   | 11.7 | 187         | 36.3 | 258              | 50.1 | 515         | 547   | 0      | 32      | 4 (1)   | 620          | -         | -              |                    |
| Dentist                                                                                                                                                   | 11              | 3.3  | 45                   | 13.5 | 118         | 35.3 | 160              | 47.9 | 334         | 380   | 10     | 36      | 3 (1)   | 598          | -         | -              |                    |
| Veterinarian                                                                                                                                              | 7               | 1.9  | 45                   | 12.2 | 141         | 38.2 | 176              | 47.7 | 369         | 403   | 1      | 33      | 3 (1)   | 606          | -         | -              |                    |
| Access to rapid diagnostic tests.                                                                                                                         |                 |      |                      |      |             |      |                  |      |             |       |        |         |         |              |           |                |                    |
| Total                                                                                                                                                     | 60              | 5.2  | 178                  | 15.4 | 356         | 30.9 | 559              | 48.5 | 1153        | 1330  | 76     | 101     | 3 (1)   | -            | 0.002     | -              |                    |
| Doctor                                                                                                                                                    | 19              | 3.7  | 95                   | 18.6 | 164         | 32.2 | 232              | 45.5 | 510         | 547   | 5      | 32      | 3 (1)   | 561          | -         | a              |                    |
| Dentist                                                                                                                                                   | 33              | 11.8 | 43                   | 15.4 | 71          | 25.4 | 132              | 47.3 | 279         | 380   | 63     | 38      | 3 (2)   | 546          | -         | a              |                    |
| Veterinarian                                                                                                                                              | 8               | 2.2  | 40                   | 11.0 | 121         | 33.2 | 195              | 53.6 | 364         | 403   | 8      | 31      | 4 (1)   | 624          | -         | b              |                    |
| More education/training on antibiotic prescribing.                                                                                                        |                 |      |                      |      |             |      |                  |      |             |       |        |         |         |              |           |                |                    |
| Total                                                                                                                                                     | 47              | 3.8  | 193                  | 15.8 | 458         | 37.5 | 524              | 42.9 | 1222        | 1330  | 8      | 100     | 3 (1)   | -            | <0.001    | -              |                    |
| Doctor                                                                                                                                                    | 25              | 4.9  | 101                  | 19.6 | 203         | 39.5 | 185              | 36.0 | 514         | 547   | 2      | 31      | 3 (1)   | 561          | -         | a              |                    |
| Dentist                                                                                                                                                   | 10              | 2.9  | 42                   | 12.4 | 117         | 34.4 | 171              | 50.3 | 340         | 380   | 4      | 36      | 4 (1)   | 663          | -         | b              |                    |
| Veterinarian                                                                                                                                              | 12              | 3.3  | 50                   | 13.6 | 138         | 37.5 | 168              | 45.7 | 368         | 403   | 2      | 33      | 3 (1)   | 635          | -         | b              |                    |
| Computer/electronic device aided prescribing.                                                                                                             |                 |      |                      |      |             |      |                  |      |             |       |        |         |         |              |           |                |                    |
| Total                                                                                                                                                     | 129             | 11.0 | 226                  | 19.3 | 407         | 34.8 | 408              | 34.9 | 1170        | 1330  | 60     | 100     | 3 (2)   | -            | <0.001    | -              |                    |
| Doctor                                                                                                                                                    | 43              | 8.5  | 92                   | 18.2 | 180         | 35.6 | 190              | 37.6 | 505         | 547   | 10     | 32      | 3 (2)   | 613          | -         | a              |                    |
| Dentist                                                                                                                                                   | 28              | 8.8  | 42                   | 13.1 | 110         | 34.4 | 140              | 43.8 | 320         | 380   | 24     | 36      | 3 (1)   | 653          | -         | a              |                    |
| Veterinarian                                                                                                                                              | 58              | 16.8 | 92                   | 26.7 | 117         | 33.9 | 78               | 22.6 | 345         | 403   | 26     | 32      | 3 (1)   | 484          | -         | b              |                    |
| Antimicrobial stewardship programs.                                                                                                                       |                 |      |                      |      |             |      |                  |      |             |       |        |         |         |              |           |                |                    |
| Total                                                                                                                                                     | 102             | 11.6 | 251                  | 28.5 | 276         | 31.4 | 251              | 28.5 | 880         | 1330  | 345    | 105     | 3 (2)   | -            | 0.001     | -              |                    |
| Doctor                                                                                                                                                    | 30              | 7.3  | 112                  | 27.1 | 142         | 34.4 | 129              | 31.2 | 413         | 547   | 101    | 33      | 3 (2)   | 470          | -         | a              |                    |
| Dentist                                                                                                                                                   | 27              | 12.1 | 65                   | 29.1 | 70          | 31.4 | 61               | 27.4 | 223         | 380   | 119    | 38      | 3 (2)   | 434          | -         | a,b            |                    |
| Veterinarian                                                                                                                                              | 45              | 18.4 | 74                   | 30.3 | 64          | 26.2 | 61               | 25.0 | 244         | 403   | 125    | 34      | 3 (1.5) | 396          | -         | b              |                    |
| Regular audit and personal feedback on my                                                                                                                 |                 |      |                      |      |             |      |                  |      |             |       |        |         |         |              |           |                |                    |



| Survey question: How helpful do you think the following measures are/would be in supporting appropriate antibiotic prescribing in YOUR place of practice?                                                                                                                                         |                 |      |                      |      |             |      |                  |      |             |       |        |         |              |           |                |                    |  |
|---------------------------------------------------------------------------------------------------------------------------------------------------------------------------------------------------------------------------------------------------------------------------------------------------|-----------------|------|----------------------|------|-------------|------|------------------|------|-------------|-------|--------|---------|--------------|-----------|----------------|--------------------|--|
|                                                                                                                                                                                                                                                                                                   | Responses       |      |                      |      |             |      |                  |      |             |       |        |         |              |           |                |                    |  |
|                                                                                                                                                                                                                                                                                                   | Not helpful (1) |      | Somewhat helpful (2) |      | Helpful (3) |      | Very helpful (4) |      | Valid Total | Total | Unsure | Missing | Median (IQR) | Mean rank | P <sup>¶</sup> | Group <sup>§</sup> |  |
|                                                                                                                                                                                                                                                                                                   | n               | %    | n                    | %    | n           | %    | n                | %    |             |       |        |         |              |           |                |                    |  |
| prescribing.                                                                                                                                                                                                                                                                                      |                 |      |                      |      |             |      |                  |      |             |       |        |         |              |           |                |                    |  |
| Total                                                                                                                                                                                                                                                                                             | 166             | 14.3 | 333                  | 28.6 | 399         | 34.3 | 266              | 22.9 | 1164        | 1330  | 65     | 101     | 3 (1)        | -         | <0.001         | -                  |  |
| Doctor                                                                                                                                                                                                                                                                                            | 48              | 9.5  | 140                  | 27.7 | 191         | 37.7 | 127              | 25.1 | 506         | 547   | 9      | 32      | 3 (2)        | 623       | -              | a                  |  |
| Dentist                                                                                                                                                                                                                                                                                           | 50              | 15.8 | 83                   | 26.3 | 108         | 34.2 | 75               | 23.7 | 316         | 380   | 27     | 37      | 3 (1)        | 584       | -              | a                  |  |
| Veterinarian                                                                                                                                                                                                                                                                                      | 68              | 19.9 | 110                  | 32.2 | 100         | 29.2 | 64               | 18.7 | 342         | 403   | 29     | 32      | 2 (1)        | 521       | -              | b                  |  |
| Restriction on prescription of certain antibiotics (requiring specialist opinion/by governing authority).                                                                                                                                                                                         |                 |      |                      |      |             |      |                  |      |             |       |        |         |              |           |                |                    |  |
| Total                                                                                                                                                                                                                                                                                             | 319             | 28.9 | 287                  | 26.0 | 254         | 23.0 | 242              | 22.0 | 1102        | 1330  | 126    | 102     | 2 (2)        | -         | <0.001         | -                  |  |
| Doctor                                                                                                                                                                                                                                                                                            | 104             | 21.1 | 135                  | 27.4 | 126         | 25.6 | 128              | 26.0 | 493         | 547   | 23     | 31      | 3 (2)        | 603       | -              | a                  |  |
| Dentist                                                                                                                                                                                                                                                                                           | 96              | 34.5 | 71                   | 25.5 | 63          | 22.7 | 48               | 17.3 | 278         | 380   | 64     | 38      | 2 (2)        | 509       | -              | b                  |  |
| Veterinarian                                                                                                                                                                                                                                                                                      | 119             | 36.0 | 81                   | 24.5 | 65          | 19.6 | 66               | 19.9 | 331         | 403   | 39     | 33      | 2 (2)        | 511       | -              | b                  |  |
| Restriction on prescription of all antibiotics (requiring specialist opinion/by governing authority).                                                                                                                                                                                             |                 |      |                      |      |             |      |                  |      |             |       |        |         |              |           |                |                    |  |
| Total                                                                                                                                                                                                                                                                                             | 881             | 75.8 | 137                  | 11.8 | 90          | 7.7  | 54               | 4.6  | 1162        | 1330  | 65     | 103     | 1 (0)        | -         | 0.008          | -                  |  |
| Doctor                                                                                                                                                                                                                                                                                            | 359             | 71.8 | 69                   | 13.8 | 45          | 9.0  | 27               | 5.4  | 500         | 547   | 16     | 31      | 1 (1)        | 605       | -              | a                  |  |
| Dentist                                                                                                                                                                                                                                                                                           | 233             | 76.1 | 35                   | 11.4 | 24          | 7.8  | 14               | 4.6  | 306         | 380   | 34     | 40      | 1 (0)        | 580       | -              | a,b                |  |
| Veterinarian                                                                                                                                                                                                                                                                                      | 289             | 81.2 | 33                   | 9.3  | 21          | 5.9  | 13               | 3.7  | 356         | 403   | 15     | 32      | 1 (0)        | 550       | -              | b                  |  |
| ¶Kruskal-Wallis test P-value                                                                                                                                                                                                                                                                      |                 |      |                      |      |             |      |                  |      |             |       |        |         |              |           |                |                    |  |
| §Groups with letters in common are not significantly different (P-value of pairwise comparison >0.05); Groups with different letters are significantly different (P-value of comparison >0.05); Groups with different letters are significantly different (P-value of pairwise comparison <0.05). |                 |      |                      |      |             |      |                  |      |             |       |        |         |              |           |                |                    |  |
